1 **Title**

2

3 A hidden Markov model approach for simultaneously estimating local ancestry and  
4 admixture time using next generation sequence data in samples of arbitrary ploidy

5

6 **Short Title**

7

8 Estimating local ancestry and admixture time in samples of arbitrary ploidy

9

10 **Authors**

11

12 Russell Corbett-Detig<sup>1,2,\*</sup> and Rasmus Nielsen<sup>2,3</sup>

13

14 <sup>1</sup>Department of Biomolecular Engineering, UC Santa Cruz, Santa Cruz, CA

15 <sup>2</sup>Department of Integrative Biology, UC Berkeley, Berkeley, CA

16 <sup>3</sup>The Natural History Museum of Denmark, University of Copenhagen, Denmark.

17 \*Correspondence to: russcd@gmail.com

18

19 **Keywords**

20

21 Local Ancestry Inference, Admixture, Hidden Markov Model, *Drosophila melanogaster*,

22 Pool-seq

23

24

25 **Abstract**

26 Admixture—the mixing of genomes from divergent populations—is increasingly  
27 appreciated as a central process in evolution. To characterize and quantify patterns of  
28 admixture across the genome, a number of methods have been developed for local ancestry  
29 inference. However, existing approaches have a number of shortcomings. First, all local  
30 ancestry inference methods require some prior assumption about the expected ancestry  
31 tract lengths. Second, existing methods generally require diploid genotypes, which is not  
32 feasible to obtain for many sequencing projects. Third, many methods assume samples are  
33 diploid, however a wide variety of sequencing applications will fail to meet this  
34 assumption. To address these issues, we introduce a novel hidden Markov model for  
35 estimating local ancestry that models the read pileup data, rather than genotypes, is  
36 generalized to arbitrary ploidy, and can estimate the time since admixture during local  
37 ancestry inference. We demonstrate that our method can simultaneously estimate the time  
38 since admixture and local ancestry with good accuracy, and that it performs well on  
39 samples of high ploidy—*i.e.* 100 or more chromosomes. We apply our method to pooled  
40 sequencing data derived from populations of *Drosophila melanogaster* on an ancestry cline  
41 on the east coast of North America. We find that regions of low recombination show  
42 steeper clines than regions of high recombination, suggesting that selection against foreign  
43 ancestry has had the largest effect in these regions presumably due to increased linkage  
44 between neutral and selected sites. We also identify numerous outlier loci associated with  
45 behavior suggesting selection associated with prezygotic reproductive isolation. Finally, we  
46 identify candidate genes associated with reproductive isolation between ancestral

47 subpopulations of *D. melanogaster*. Our results illustrate the potential of local ancestry  
48 inference for elucidating fundamental evolutionary processes.

49

## 50 **Author Summary**

51 When divergent populations hybridize their offspring obtain a portion of their genome  
52 from each parent population. Although the average ancestry proportion in each descendant  
53 is equal to the proportion of ancestors from each of the ancestral populations, the  
54 contribution of each ancestry type is variable across the genome. Estimating local ancestry  
55 within admixed individuals is a fundamental goal for evolutionary genetics, and here we  
56 develop a method for doing this that circumvents many of the problems associated with  
57 existing methods. Briefly, our method can use short read data, rather than genotypes and  
58 can be applied to samples with any number of chromosomes. Furthermore, our method  
59 simultaneously estimates local ancestry, and the number of generations since admixture—  
60 the time that the two ancestral populations first encountered each other. Finally, in  
61 applying our method to data from an admixture zone between ancestral populations of  
62 *Drosophila melanogaster*, we find many lines of evidence consistent with natural selection  
63 operating to against the introduction of foreign ancestry into populations of predominantly  
64 one ancestry type. Because of the generality of this method, we expect that it will be useful  
65 for a wide variety of existing and ongoing research projects.

66

## 67 **Introduction**

68 Characterizing the biological consequences of admixture—the mixing of genomes from  
69 divergent ancestral populations—is a fundamental and important challenge in  
70 evolutionary genetics. Admixture has been reported in a variety of natural populations of  
71 animals [1,2], plants [3-5] and humans [6,7], and theoretical and empirical evidence  
72 suggests that admixture may affect a diverse suite of evolutionary processes. Individuals'  
73 ancestry can affect disease susceptibility in admixed populations, and inferring and  
74 correcting for sample population ancestries is a common practice in human genome wide  
75 association studies [8-10]. More generally, admixture has the potential to influence  
76 patterns of genetic variation within populations [11,12], to introduce novel adaptive  
77 [13,14] and deleterious variants [7,15,16], as well as to disrupt epistatic gene networks  
78 [17,18]. Therefore, developing a comprehensive understanding of the extent of admixture  
79 in natural populations and resulting mosaic genome structures is essential to furthering  
80 our understanding of a diverse suite of evolutionary processes.

81  
82 Estimating genome-wide ancestry proportions has become a common practice in  
83 population genetic inference. For example, the program STRUCTURE [19], originally  
84 released in 2000, uses a Bayesian framework to model the ancestry proportions of  
85 individuals derived from any number of source populations based on genotype data at a set  
86 of unlinked genetic markers. More recently, this model for ancestry proportion estimation  
87 has been extended to cases where individual genotypes are not known, but can be studied  
88 probabilistically using low-coverage sequencing short read sequencing data [20], which is  
89 an important step towards accommodating modern sequencing practices. Additionally,



90 Bergland *et al.* [21] developed a method for estimating ancestry proportions in pooled  
91 population samples of relatively high ploidy (*i.e.* 40-250 distinct chromosomes) from short  
92 read sequencing data. In general, it is straightforward to estimate genome-wide ancestry  
93 proportions using a number of sequencing strategies and applications.

94

95 It is substantially more challenging to accurately estimate local ancestry (LA) at markers  
96 distributed along the genome of a sample. Nonetheless, analyses of LA have the potential to  
97 yield more nuanced insights into our understanding of the evolutionary processes affecting  
98 ancestry proportions across the genome. One of the first LAI methods was an extension of  
99 the STRUCTURE [19] framework that modeled the correlation in ancestry among markers  
100 due to linkage. Because the ancestry at each locus is not observed, Falush *et al.* [22]  
101 suggested that a hidden Markov model is a straightforward means of inferring the ancestry  
102 states at each site in the genome (which are unobserved) based on observed genotype data  
103 distributed along a chromosome. Most subsequent LAI methods have also used an HMM  
104 framework. The majority of LAI models that have been developed are geared towards  
105 estimating LA in admixed human populations (*e.g.* [23,24]). Consequently, most existing  
106 LAI methods are limited to diploid genomes with high quality genotype calls. Furthermore,  
107 many methods require phased reference panels [24,25], and require the user to provide an  
108 estimate of, or make implicit assumptions about, the number of generations since the initial  
109 admixture event [2,23-25]. This is straightforward with human population genomic  
110 samples, where abundant high quality genotyped samples are available and for which well-  
111 documented demographic histories are sometimes known. However for most other species,

112 demographic histories are less well characterized, and assumptions about admixture times  
113 may bias the result of LAI methods.

114

115 A number of approaches exist to estimate the time since admixture based on a well  
116 characterized ancestry tract length distributions [26-29] but in general, these parameters  
117 are unknown prior to LAI. We may therefore expect to improve LAI by simultaneously  
118 estimating LA and demographic parameters (*e.g.* admixture time). Furthermore, in the  
119 majority of sequencing applications, relatively low individual sequencing coverage is often  
120 used to probabilistically estimate individual and population allele frequencies (*e.g.* [30])  
121 but these data are often not sufficient to determine high confidence genotypes that are  
122 required for existing LAI applications. Hence, there is a clear need for a general LAI method  
123 that can accommodate genotype uncertainty and requires less advanced knowledge of  
124 admixed populations' demographic histories.

125

126 Here, we introduce a framework for simultaneously estimating LA using short read pileup  
127 data and the time of admixture within a population. Briefly, as with many previously  
128 proposed LAI methods, we model ancestry across the genome of a sample as a hidden  
129 Markov model (HMM). We estimate LA by explicitly modeling read counts as a function of  
130 sample allele frequencies within an admixed population. Our method is generalized to  
131 accommodate arbitrary sample ploidies, and is therefore applicable to haploid (or inbred),  
132 diploid, tetraploid, as well as pooled sequencing applications. We show that this approach  
133 accurately infers the time since admixture when data are simulated under the assumed  
134 model. Furthermore, our method yields accurate LA estimates for simulated datasets,

135 including samples of high sample ploidy and including evolutionary scenarios that violate  
136 the assumptions of the neutral demographic model. In comparisons between ours and one  
137 existing LAI method, LAMPanc [23], we find that our approach offers a significant  
138 improvement and is accurate over longer time scales. Furthermore, we demonstrate, using  
139 a published dataset, that even state-of-the-art LAI methods can be significantly impacted by  
140 assumptions about the time since admixture, and that our method provides a solution to  
141 this problem.

142

143 Finally, we apply this method to a *Drosophila melanogaster* ancestry cline on the east coast  
144 of North America. This species originated in sub-Saharan Africa, and approximately  
145 10,000—15,000 years ago a subpopulation expanded out of the ancestral range. During  
146 this expansion, the derived subpopulation experienced a population bottleneck that  
147 resulted in decreased nucleotide polymorphism, extended linkage disequilibrium within  
148 the derived population and substantial genetic differentiation between ancestral and  
149 derived populations [2,31-35]. Hereafter, the ancestral population will be referred to as  
150 “African” and the derived population as “Cosmopolitan”. Following this bottleneck,  
151 descendant populations of African and Cosmopolitan *D. melanogaster* have admixed in  
152 numerous geographic regions [2,11,21]. Of particular relevance to this work, North  
153 America was colonized recently by a population descendent from African individuals from  
154 the South, and by a population descendent from cosmopolitan *D. melanogaster* in the North  
155 [11,21,34]. Where these populations encountered each other in eastern North America,  
156 they form an ancestry cline where southern populations have a greater contribution of  
157 African ancestry than northern populations [21].

158

159 Previous work on these ancestry clines has shown that ancestry proportions vary across  
160 populations with increasing proportions of cosmopolitan alleles in more temperate  
161 localities. Evidence suggests spatially varying selection affects the distribution of genetic  
162 variants [36-41]. Furthermore, strong epistatic reproductive isolation barriers partially  
163 isolate individuals from northern and southern populations along this ancestry cline  
164 [42,43]. This may be generally consistent with recent observations of ancestry-associated  
165 epistatic fitness interactions within a *D. melanogaster* population in North Carolina [17],  
166 and with the observation of widespread fitness epistasis between populations of this  
167 species more generally [44]. There is therefore good reason to believe that natural  
168 selection has acted to shape LA clines that are tightly linked to selected mutations in these  
169 *D. melanogaster* populations.

170

171 Here, we show that the slopes of LA clines in North American *D. melanogaster* are  
172 positively correlated with recombination rates, consistent with natural selection acting to  
173 reduce African introgression into predominantly Cosmopolitan populations. We also find  
174 that the X displays a higher rate of LA outlier loci, potentially consistent with a greater role  
175 of the X chromosome in genetically isolating Cosmopolitan and African lineages, and we  
176 identify numerous clinal outlier loci. These loci are disproportionately likely to be  
177 associated with organismal behavior, and may play important roles in generating and  
178 maintaining reproductive isolation between African and Cosmopolitan *D. melanogaster*  
179 populations.

180

## 181 **Results and Discussion**

182

### 183 **The Model**

184 Although admixed populations often are diploid, we derived a general model of ploidy in  
185 which the individual has  $n$  gene copies at each locus, i.e. for diploid species  $n = 2$ . In  
186 practice, sequences are often obtained from fully or partially inbred individuals (e.g. [35]),  
187 which represent only a single uniquely derived chromosome. It is also common to pool  
188 individuals prior to sequencing for allele frequency estimation, so called pool-seq (e.g.  
189 [21,36,38,45-48]). If the pooling fractions are exactly equal, such a sample of  $b$  diploid  
190 individuals can be treated as a sample from a single individual with ploidy  $n = 2b$ . Although  
191 that requirement is restrictive, pool-seq has been experimentally validated as a method for  
192 accurate allele frequency estimation—*i.e.* alleles are approximately binomially sampled  
193 from the sample allele frequencies [49]. We therefore aimed to derive a model that can  
194 accommodate arbitrary sample ploidies. In the model, we assumed that the focal  
195 population was founded following a single discrete admixture event between two ancestral  
196 subpopulations, labeled 0 and 1, with admixture proportions  $1-m$  and  $m$ , respectively, at a  
197 time  $t$  generations in the past. We modeled emission probabilities such that the method  
198 can work directly on read pileup data, rather than high quality known genotypes. Briefly,  
199 in our model, we specify an HMM  $\{H_v\}$  with state space  $S = \{0,1,\dots,n\}$ , where  $H_v = i$ ,  $i \in S$ ,  
200 indicates that in the  $v$ th position  $i$  chromosomes are from population 0 and  $n - i$   
201 chromosomes are from population 1. In other words, this HMM enables one to estimate  
202 what ancestry frequencies are present at a given site along a chromosome within a sample.  
203 Importantly, we designed this method to simultaneously estimate the time of admixture,

204 which is related to the correlation between ancestry informative markers along a  
205 chromosome. See Methods for a complete description of the HMM including the emissions  
206 and transition probability calculations. The source code and manual are available at  
207 [https://github.com/russcd/Ancestry\\_HMM](https://github.com/russcd/Ancestry_HMM).

208

### 209 **Dependence on Ancestral Linkage Disequilibrium**

210 Within an admixed population, there are two sources of LD. LD that is induced due to the  
211 correlation of alleles from the same ancestry type (*i.e.* admixture LD), and LD that is  
212 present within each of the ancestral populations (ancestral LD). Admixture LD, is the signal  
213 of LA that we seek to detect using the HMM. The second type, ancestral LD, limits the  
214 independence of the ancestral information captured by each marker, and is expected to  
215 confound HMM-based analyses, particularly as we aimed to estimate the time since  
216 admixture within this framework. We therefore sought to quantify the effect of ancestral  
217 LD by discarding one of each pair of sites in LD within either ancestral population. We  
218 found that ancestral LD tends to increase admixture time estimates obtained using our  
219 method, and we decreased the cutoff of the LD parameter,  $|r|$ , by 0.1 until the time  
220 estimates obtained for single chromosomes were unbiased with respect to the true time  
221 since admixture. We found that  $|r| \leq 0.4$  fit this criterion, although for relatively ancient  
222 admixture events with highly skewed ancestry proportions—*i.e.*  $m < 0.1$  or  $m > 0.9$ —some  
223 residual bias was apparent in the estimates of admixture time (Figure 1). This reflects the  
224 fact that the SMC' ancestry tract distribution performs poorly with highly skewed ancestry  
225 proportions and especially for long times since admixture [50].

226

227 Figure 1 also reveals a striking difference between otherwise equivalently skewed  
228 admixture proportions. For example when  $m = 0.1$ , there was a much larger effect of  
229 ancestral LD than when  $m = 0.9$ . This is due to differences in the variability and LD within  
230 the ancestral populations. That is, due to the strong population bottleneck, cosmopolitan *D.*  
231 *melanogaster* populations have substantially more LD and fewer polymorphic sites than  
232 African *D. melanogaster* populations. Because the time estimation procedure appears to be  
233 sensitive to the amount of ancestral LD present in the data, simulations of the type we  
234 described here may be necessary to determine what  $|r|$  cutoffs are required to produce  
235 unbiased time estimates given the ancestral LD of the populations in a given analysis using  
236 this method.

237

### 238 **Accuracy and Applications to Diploid and Pooled Samples**

239 We next sought to quantify the accuracy of our approach across varying sample ploidies  
240 and times since admixture (Figure 2). Especially for moderate and short admixture times  
241 (*i.e.* 0—500 generations), our method performed well for all ploidies considered and we  
242 were able to accurately recover the correct admixture time with relatively little bias.  
243 However, as true admixture time increases, the time estimates for pooled samples become  
244 significantly less reliable and show a clear negative bias. Nonetheless, across the range of  
245 times presented in Figure 2, samples of ploidy one and two showed little bias, and we  
246 therefore believe our method will produce sufficiently accurate admixture time estimates  
247 for a wide variety of applications.

248

249 All measures of accuracy decrease with increasing time since admixture (Figure 2).  
250 However, even for relatively long times since admixture—2000 generations—and for large  
251 sample ploidies, the mean posterior error remained relatively low for all ancestry  
252 proportions and for long times since admixture. This indicates that this approach may be  
253 sufficiently accurate for a wide variety of applications, sequencing depths, and sample  
254 ploidies. Nonetheless, as the proportion of sites within the 95% credible interval decreased  
255 with larger pool sizes, it is clear that for larger pools the posterior credible interval tends to  
256 be too narrow, and correcting for this bias may be necessary for applications that are  
257 sensitive to the accuracy of the credible interval.

258

### 259 **Non-Independence Among Ancestry Tracts**

260 As described above, estimates of the time of admixture demonstrate an apparent bias in  
261 pools of higher ploidy (Figure 2). Specifically, time tends to be slightly overestimated for  
262 relatively short admixture times and underestimated at relatively long admixture times.  
263 This is particularly apparent at highly skewed ancestry proportions. Given that this bias is  
264 primarily evident in pools of 10 to 20 individuals, we hypothesized that it might be due to  
265 the non-independence of ancestry tracts among chromosomes, which should tend to  
266 disproportionately affect samples of higher ploidy because all ancestry breakpoints are  
267 assumed to be independent in our model. To test this, we simulated genotype data from  
268 independent and identically distributed exponential tract lengths as is assumed by our  
269 model. When we ran our HMM on this dataset, we found that no bias is evident for  
270 simulations of up to 2000 generations (Figure 3), indicating that the primary cause of this  
271 bias was violations in the real data of the independence of ancestry tracts that we assumed



272 when computing the transition probabilities. However, it should be possible to quantify  
273 and correct for this bias in applications of this method that aim to estimate the time since  
274 admixture.

275

## 276 **Robustness to Unknown Population Size**

277 The transition probabilities of this HMM depend on knowledge of the population size. In  
278 practice, this parameter is unlikely to be known with certainty. Hence, to assess the impact  
279 of misspecification of the population size, we performed simulations using a range of  
280 population sizes that span three orders of magnitude ( $N=100$ , 1000, 10000, and 100000).  
281 All analyses presented here were conducted by applying our HMM to haploid and diploid  
282 samples, but qualitatively similar results hold for samples of larger ploidy (not shown). We  
283 then analyzed these data assuming the default population size, 10000, is correct. For  
284 relatively short times since admixture, there was not a clear bias for any of the true  
285 population sizes considered. However, at longer true admixture times, estimated  
286 admixture times for both  $N=100$  and  $N=1000$  asymptote at a number of generations near to  
287 the population sizes. This result reflects the fact that smaller populations will tend to  
288 coalesce at a portion of the loci in the genome relatively quickly, and ancestry tracts cannot  
289 become smaller following coalescence. Nonetheless, the accuracy of LAI remained high  
290 even when time estimates were unreliable (Figure 4) for the tested marker densities and  
291 patterns of LD. Furthermore, in some cases it should be straightforward to determine if a  
292 population has coalesced to either ancestry state at a large portion of the loci in the  
293 genome, potentially obviating this issue.

294

295 A more subtle departure from the expectation was evident for population sizes that are  
296 larger than we assumed in analyzing these data (Figure 4). This likely reflects the fact that  
297 the probability of back coalescence to the previous marginal genealogy to the left after a  
298 recombination event is inversely related to the population size. Hence, the rate of transition  
299 between ancestry types is actually slightly higher in larger populations where back  
300 coalescence is less likely than we assumed during the LAI procedure. This produced a slight  
301 upward bias in the estimates of admixture time when the population was assumed to be  
302 smaller than it is in reality. However, this bias appears to be relatively minor, and we  
303 expect that time estimates obtained using this method will be useful so long as population  
304 sizes can be approximated to within an order of magnitude. Of course, this bias is not  
305 unique to our application, and it will affect methods that aim to estimate admixture time  
306 after LAI as well. That is, estimating the correct effective population size is an inherent  
307 problem for all admixture demographic inference methods.

308

### 309 **Application to Ancient Admixture**

310 Although it is clear that accurately estimating relatively ancient admixture times is  
311 challenging in higher ploidy samples, we sought to determine the limits of our approach for  
312 LAI and time estimation for longer admixture times for haploid sequence data. Because of  
313 rapid coalescence in smaller samples (see above), we performed admixture simulations  
314 with a diploid effective population size of 100,000. It is clear that there is a limit to the  
315 inferences that can be made directly using our method. Like the higher ploidy samples,  
316 time estimates for haploid samples departed from expectations shortly after 2,000  
317 generations since admixture (Figure 5). Nonetheless, the magnitude of this bias is slight,

318 and it is likely that it could be corrected for when applying this method even for very  
319 ancient admixture events. For all admixture times considered, LAI remained acceptably  
320 accurate despite the slight bias in time estimates (Figure 5).

321

### 322 **Reference Panel Size**

323 One question is what effect varying the reference panel sizes will have on LAI inference  
324 using this method. We therefore compared results from reference panels of size 10 with  
325 those from panels of size 100 (Figure 6). As with results obtained for reference panels of  
326 size 50, panels of size 100 were sufficient to accurately estimate admixture time and LA  
327 over many generations since admixture. Whereas, when panel sizes were just 10  
328 chromosomes, time estimates were clearly biased and the result was variable across  
329 ancestry proportions (Figure 6). However, since there was a strong correlation between  
330 true and estimated admixture times even with relatively small panel sizes, it may therefore  
331 be possible to infer the correct time by quantifying this bias through simulation and  
332 correcting for it. Furthermore, although LAI is clearly less reliable with smaller panels,  
333 these results are not altogether discouraging and this approach, in conjunction with  
334 modest reference panels may still be effective for some applications.

335

### 336 **High Sample Ploidy**

337 In a wide variety of pool-seq applications, samples are pooled in larger groups than we  
338 have considered above (*e.g.* [36,45,47]). We are therefore interested in determining how  
339 our method will perform on pools of 100 individuals. Towards this, we performed  
340 simulations as before, but we designed our parameters to resemble those of the pooled

341 sequencing data that we analyze in the application of this method below. Specifically, we  
342 simulated data with a mean sequencing depth of 25, a time since admixture of 1500  
343 generations, and an ancestry proportion of 0.8. Consistent with results for ploidy 20, we  
344 found that time tends to be dramatically underestimated (*i.e.* the mean estimate of  
345 admixture time was 680 generations). However, when we provided the time since  
346 admixture, our method produced reasonably accurate LAI for these samples. Although the  
347 posterior credible interval was again too narrow, the mean posterior error was just 5.4 (or  
348 0.054 if expressed as an ancestry frequency), indicating that this approach can produce LA  
349 estimates that are close to their true values for existing sequencing datasets (*e.g.* Figure 7).  
350 However, the HMM's run time increases dramatically for higher ploidy samples and higher  
351 sequencing depths, a factor that may affect the utility of this program for some analyses.  
352 Nonetheless, for more than 36,000 markers, a sample ploidy of 100 and a mean sequencing  
353 depth of 25, the average runtime was approximately 42 hours. In contrast, for the same set  
354 of parameters, but where individuals are sequenced and analyzed as diploids, the mean  
355 runtime was just 8 minutes.

356

### 357 **Robustness to Deviations From the Neutral Demographic Model**

358 An important concern is that many biologically plausible admixture models would violate  
359 the assumptions of this inference method. In particular, continuous migration and selection  
360 acting on alleles from one parental population are two potential causes of deviation from  
361 the expected model in the true data. To assess the extent of this potential bias, we  
362 performed additional simulations. First, we considered continuous migration at a constant  
363 rate that began  $t$  generations prior to sampling. In simulations with continuous migration,

364 additional non-recombinant migrants enter the population each generation. Relative to a  
 365 single pulse admixture model, this indicates that the ancestry tract lengths will tend to be  
 366 longer than those under a single pulse admixture model in which all individuals entered at  
 367 time  $t$ . Indeed, we found that admixture times tended to be underestimated with models of  
 368 continuous migration. However, the accuracy of LAI remained high across all situations  
 369 considered here (Table 1), indicating that the LAI aspect of this approach may be robust to  
 370 alternative demographic models.

371

372 **Table 1.** Parameter estimation and LAI when admixture occurs at a constant rate, rather  
 373 than in a single pulse.

| Admixture Time | Number of Loci | Sample Ploidy | Estimated Time | Proportion in 95% CI | Mean 95% CI Size | Mean Posterior Error | Proportion MLE Correct |       |
|----------------|----------------|---------------|----------------|----------------------|------------------|----------------------|------------------------|-------|
| 100            | 2              | 1             | 96             | 1.000                | 0.017            | 0.005                | 0.996                  |       |
|                |                | 2             | 98             | 0.999                | 0.082            | 0.022                | 0.986                  |       |
|                |                | 10            | 105            | 0.969                | 1.370            | 0.457                | 0.631                  |       |
|                |                | 20            | 93             | 0.923                | 2.194            | 0.856                | 0.340                  |       |
|                | 5              | 1             | 91             | 1.000                | 0.014            | 0.004                | 0.997                  |       |
|                |                | 2             | 88             | 0.999                | 0.058            | 0.017                | 0.988                  |       |
|                |                | 10            | 85             | 0.942                | 0.898            | 0.382                | 0.662                  |       |
|                |                | 20            | 65             | 0.949                | 1.450            | 0.834                | 0.302                  |       |
|                | 10             | 1             | 1              | 88                   | 1.000            | 0.014                | 0.004                  | 0.997 |
|                |                |               | 2              | 86                   | 0.999            | 0.060                | 0.016                  | 0.989 |
|                |                |               | 10             | 84                   | 0.972            | 1.049                | 0.356                  | 0.719 |
|                |                |               | 20             | 76                   | 0.944            | 1.887                | 0.704                  | 0.459 |
| 20             |                | 1             | 79             | 1.000                | 0.012            | 0.004                | 0.997                  |       |
|                |                | 2             | 74             | 0.999                | 0.041            | 0.013                | 0.991                  |       |
|                |                | 10            | 65             | 0.939                | 0.645            | 0.305                | 0.726                  |       |
|                |                | 20            | 53             | 0.779                | 1.082            | 0.704                | 0.396                  |       |
| 500            | 2              | 1             | 521            | 0.998                | 0.096            | 0.027                | 0.980                  |       |
|                |                | 2             | 518            | 0.993                | 0.352            | 0.096                | 0.932                  |       |
|                |                | 10            | 595            | 0.969                | 2.243            | 0.735                | 0.472                  |       |
|                | 5              | 20            | 486            | 0.923                | 3.272            | 1.184                | 0.288                  |       |
|                |                | 1             | 430            | 0.998                | 0.085            | 0.024                | 0.983                  |       |
|                |                | 2             | 411            | 0.993                | 0.312            | 0.087                | 0.938                  |       |

|    |    |     |       |       |       |       |
|----|----|-----|-------|-------|-------|-------|
|    | 10 | 287 | 0.955 | 1.842 | 0.639 | 0.523 |
|    | 20 | 227 | 0.881 | 2.712 | 1.093 | 0.325 |
|    | 1  | 341 | 0.998 | 0.058 | 0.018 | 0.987 |
| 10 | 2  | 303 | 0.994 | 0.192 | 0.059 | 0.956 |
|    | 10 | 177 | 0.914 | 1.197 | 0.511 | 0.592 |
|    | 20 | 140 | 0.793 | 1.884 | 0.992 | 0.343 |
|    | 1  | 272 | 0.999 | 0.040 | 0.011 | 0.992 |
| 20 | 2  | 236 | 0.995 | 0.142 | 0.042 | 0.970 |
|    | 10 | 124 | 0.957 | 0.974 | 0.349 | 0.740 |
|    | 20 | 100 | 0.918 | 1.607 | 0.641 | 0.563 |

374

375

376 In the second set of simulations, we considered additive selection on alleles that are  
377 perfectly correlated with local ancestry in a given region (*i.e.* selected sites with  
378 frequencies 0 in population 0 and frequency 1 in population 1), and experience relatively  
379 strong selection (selective coefficients were between 0.005 and 0.05). We placed selected  
380 sites at 2, 5, 10 and 20 loci distributed randomly across the simulated chromosome, where  
381 admixture occurred through a single pulse. Ancestry tracts tend to be longer immediately  
382 surrounding selected sites, and we therefore expected admixture time to be  
383 underestimated when selection is widespread. When the number of selected loci was small,  
384 time estimates were nearly unbiased (Table 2), suggesting that our approach can yield  
385 reliable admixture time estimates despite the presence of a small number of selected loci  
386 (*i.e.* 2 selected loci on a chromosome arm). However, with more widespread selection on  
387 alleles associated with local ancestry, time estimates showed a downward bias that  
388 increased with increasing numbers of selected loci. This is likely because selected loci will  
389 tend to be associated with longer ancestry tracts due to hitchhiking. However, the accuracy  
390 of the LAI remains high for all selection scenarios that we considered here, further

391 indicating that our method can robustly delineate LA, even when the data violate  
 392 assumptions of the inference method (Table 1,2).

393

394 **Table 2.** Parameter estimation and LAI when a subset of loci experience natural selection  
 395 in the admixed population.

| Admixture Time | Migration Rate | Sample Ploidy | Estimated Time | Proportion in 95% CI | Mean         | Mean            | Proportion  |
|----------------|----------------|---------------|----------------|----------------------|--------------|-----------------|-------------|
|                |                |               |                |                      | 95% CI Width | Posterior Error | MLE Correct |
| 100            | 0.0005         | 1             | 53             | 1.000                | 0.002        | 0.001           | 1.000       |
|                |                | 2             | 49             | 1.000                | 0.006        | 0.002           | 0.998       |
|                |                | 10            | 129            | 0.963                | 0.305        | 0.168           | 0.839       |
|                |                | 20            | 98             | 0.545                | 0.328        | 0.661           | 0.353       |
|                | 0.001          | 1             | 55             | 1.000                | 0.004        | 0.001           | 0.999       |
|                |                | 2             | 53             | 1.000                | 0.013        | 0.004           | 0.997       |
|                |                | 10            | 156            | 0.951                | 0.558        | 0.288           | 0.727       |
|                |                | 20            | 90             | 0.551                | 0.719        | 0.858           | 0.179       |
|                | 0.002          | 1             | 54             | 1.000                | 0.006        | 0.002           | 0.999       |
|                |                | 2             | 52             | 0.999                | 0.019        | 0.006           | 0.996       |
|                |                | 10            | 123            | 0.949                | 0.758        | 0.354           | 0.671       |
|                |                | 20            | 74             | 0.679                | 1.115        | 0.889           | 0.176       |
|                | 0.004          | 1             | 43             | 1.000                | 0.008        | 0.002           | 0.998       |
|                |                | 2             | 54             | 0.999                | 0.035        | 0.010           | 0.993       |
|                |                | 10            | 91             | 0.955                | 1.085        | 0.443           | 0.605       |
|                |                | 20            | 75             | 0.860                | 1.788        | 0.889           | 0.248       |
|                | 0.0005         | 1             | 254            | 0.999                | 0.033        | 0.010           | 0.993       |
|                |                | 2             | 250            | 0.997                | 0.121        | 0.036           | 0.974       |
|                |                | 10            | 331            | 0.956                | 1.395        | 0.528           | 0.557       |
|                |                | 20            | 333            | 0.882                | 2.321        | 1.018           | 0.261       |
| 0.001          | 1              | 266           | 0.999          | 0.049                | 0.014        | 0.990           |             |
|                | 2              | 268           | 0.996          | 0.198                | 0.055        | 0.962           |             |
|                | 10             | 325           | 0.967          | 1.887                | 0.628        | 0.521           |             |
|                | 20             | 366           | 0.926          | 3.049                | 1.109        | 0.294           |             |
| 0.002          | 1              | 294           | 0.999          | 0.055                | 0.016        | 0.989           |             |
|                | 2              | 297           | 0.996          | 0.238                | 0.064        | 0.956           |             |
|                | 10             | 352           | 0.977          | 2.076                | 0.639        | 0.542           |             |
|                | 20             | 370           | 0.951          | 3.238                | 1.073        | 0.336           |             |
| 0.004          | 1              | 346           | 0.999          | 0.038                | 0.010        | 0.993           |             |
|                | 2              | 350           | 0.997          | 0.164                | 0.042        | 0.973           |             |
|                | 10             | 403           | 0.989          | 1.634                | 0.455        | 0.692           |             |

20            462            0.979            2.773            0.833            0.473

396

397

### 398 **Comparison to LAMPanc**

399 We next compared the results of our method to those of LAMPanc [23]. Because LAMPanc  
400 accepts only diploid genotypes, we provided this program diploid genotype data. However,  
401 for these comparisons, we still ran our method on simulated read pileups with the mean  
402 depth equal to 2. LAMPanc was originally designed for local ancestry inference in very  
403 recently admixed populations. As expected, LAMPanc performed acceptably for very short  
404 admixture times, but rapidly decreased in performance with increasing time (Figure 8).  
405 However, by default, LAMPanc removes sites in strong LD within the admixed samples,  
406 which includes ancestral LD, but also admixture LD—the exact signal LAI methods use to  
407 identify ancestry tracts.

408

409 We therefore reran LAMPanc, but instead of pruning LD within the admixed population, we  
410 removed sites in strong LD within the ancestral populations as described above in our  
411 method. With this modification, LAMPanc performs nearly as well as our method, but  
412 remains slightly less accurate especially at longer admixture times (Figure 8). This  
413 difference presumably reflects the windowed-based approach of LAMPanc. At longer times  
414 since admixture a given genomic window may overlap a breakpoint between ancestry  
415 tracts. Although the performance is nearly comparable with this modification, we  
416 emphasize that our method enables users to estimate the time since admixture, where this  
417 must be supplied for LAMPanc, and allows for LAI on read pileups, therefore incorporating



418 genotype uncertainty into the LAI procedure. Indeed our method is more accurate at longer  
419 timescales even when supplied with considerably lower quality read data. However  
420 LAMPanc supports LAI with multiple ancestral populations, which our method currently  
421 does not (but see Conclusions). Furthermore many extensions of LAMP utilize haplotype  
422 information, which may be particularly valuable in populations where LD extends across  
423 large distances.

424

### 425 **Assessing Applications to Human Populations**

426 Given the strong interest in studying admixture and local ancestry in human populations  
427 (*e.g.* [22-25]), it is useful to ask if our method can be applied to data consistent with  
428 admixed populations of humans. Towards that goal, we simulated data similar to what  
429 would be observed in admixture between modern European and African lineages and  
430 applied our HMM to estimate admixture times and LA. We found that our method can  
431 accurately estimate admixture times for relatively short times since admixture, however,  
432 substantially more stringent LD pruning in the reference panels is necessary to produce  
433 unbiased estimates (Figure 9). This may be expected given that linkage disequilibrium  
434 extends across longer distances in human populations than it does in *D. melanogaster*. In  
435 other words, the scales of ancestral LD and admixture LD become similar rapidly in  
436 admixed human populations. Furthermore, this approach yields accurate time estimates  
437 for shorter times since admixture than with genetic data consistent with *D. melanogaster*  
438 populations. For a relatively short time since admixture, around 100 generations, it is  
439 possible to obtain accurate and approximately unbiased estimates of the admixture time  
440 over a wide range of ancestry proportions, indicating that this method may be applicable to

441 recently admixed human populations as well (Figure 9). Nonetheless, this result  
442 underscores the need to examine biases associated with LD pruning in this approach prior  
443 to application to a given dataset.

444

#### 445 **Bias in LAI due to Uncertainty in Time of Admixture**

446 To demonstrate that assumptions about the number of generations since admixture have  
447 the potential to bias LAI, we analyzed a SNP-array dataset from Greenlandic Inuits [51,52].  
448 The authors had previously noted a significant impact of  $t$  on the LAI results produced  
449 using RFMix [24], which we were able to reproduce here for chromosome 10 (Figure 10).  
450 Indeed, even for comparisons between  $t = 5$  and  $t = 20$ , both of which may be biologically  
451 plausible for these populations, the mean difference in posterior probabilities between  
452 samples estimated using RFMix was 0.0903 (Figure 10). However, when we applied our  
453 method to these data, a clear optimum from  $t$  was obtained at approximately 6-7  
454 generations prior to the present (Figure 10). This comparison therefore demonstrates that  
455 even relatively minor changes in assumptions of  $t$  have the potential to strongly impact LAI  
456 results, and underscores the importance of simultaneously performing LAI while  
457 estimating  $t$ .

458

459 However, these results also indicate that our method may not be robust in situations where  
460 the background LD is high and ancestry informative markers are neither common nor  
461 distributed evenly across the genome. When we compared the results of our method at  $t = 5$   
462 and  $t = 20$ , we obtained similar differences in the mean posterior among individuals as with  
463 RFMix. There are likely two causes. First, the datasets considered were generated with a

464 metabochip SNP-chip [53], which contains a highly non-uniform distribution of markers  
465 across the genome. Second, the ancestral LD in the Inuit population is extensive [52], and  
466 we could only retain a relatively small proportion of the markers after LD pruning in the  
467 reference panels. These results therefore also underscore the challenges of LAI when the  
468 signal to noise ratio is low.

469

### 470 **Patterns of LA on Inversion Bearing Chromosomes in *D. melanogaster***

471 Given their effects suppressing recombination in large genomic regions, chromosomal  
472 inversions may be expected to strongly affect LAI [2,54]. Although we attempted to limit  
473 the impact of chromosomal inversions by eliminating known polymorphic arrangements  
474 from the reference panels (see methods), many known inversions are present within the  
475 pool-seq samples we aimed to analyze [55]. We therefore focused on known inverted  
476 haplotypes within the DGPR samples [54,56-58], which are comprised of inbred  
477 individuals, and therefore phase is known across the entire chromosome.

478

479 In comparing LA estimates between inverted and standard arrangements, it is clear that  
480 chromosomal inversions can substantially affect LA across the genomes (Figure 11). In  
481 general, the chromosomal inversions considered in this work originated in African  
482 populations of *D. melanogaster* [54], and consistent with this observation, most inversion  
483 bearing chromosomes showed evidence for elevated African ancestry. This was  
484 particularly evident in the regions surrounding breakpoints, where recombination with  
485 standard arrangement chromosomes is most strongly suppressed. Importantly, this pattern  
486 continued outside of inversion breakpoints as well, consistent with numerous observations

487 that recombination is repressed in heterokaryotypes in regions well outside of the  
488 inversion breakpoints in *Drosophila* (e.g. [2,54,59]). In(3R)Mo is an exception to this  
489 general pattern of elevated African ancestry within inverted arrangements (Figure 11).  
490 This inversion originated within a cosmopolitan population [54], and has only rarely been  
491 observed within sub-Saharan Africa [60,61]. Consistent with these observations, In(3R)Mo  
492 displayed lower overall African ancestry than chromosome arm 3R than standard  
493 arrangement chromosomes.

494  
495 Although chromosomal inversions may affect patterns of LA in the genome on this ancestry  
496 cline, we believed including chromosomal inversions in the pool-seq datasets would not  
497 heavily bias our analysis of LA clines. Inversions tend to be low frequency in most  
498 populations studied [55], and because they affect LA in broad swaths of the genome—  
499 sometimes entire chromosome arms—including inversions is unlikely to affect LA cline  
500 outlier identification which appears to affect much finer scale LA (below). Furthermore,  
501 inversion breakpoint regions were not enriched for LA cline outliers in our analysis (Table  
502 3), suggesting that inversions have a limited impact on overall patterns of local ancestry on  
503 this cline. Nonetheless, the LAI complications associated with chromosomal inversions  
504 should be considered when testing selective hypotheses for chromosomal inversions as  
505 genetic differentiation may be related to LA, rather than arrangement-specific selection in  
506 admixed populations such as those found in North America.

507  
508 **Table 3.** LA clines in the genomic intervals immediately surrounding breakpoints of known  
509 polymorphic inversions.

| Inversion | Breakpoint | Rho     | p-value |
|-----------|------------|---------|---------|
|           | Distal     | 0.0298  | 0.923   |
| In(2L)t   | Proximal   | -0.297  | 0.325   |
|           | Proximal   | -0.0615 | 0.849   |
| In(2R)NS  | Distal     | 0.254   | 0.426   |
|           | Proximal   | -0.336  | 0.261   |
| In(3R)K   | Distal     | -0.686  | 0.00958 |
|           | Proximal   | -0.494  | 0.0858  |
| In(3R)Mo  | Distal     | -0.631  | 0.0207  |
|           | Proximal   | 0.193   | 0.527   |
| In(3R)P   | Distal     | 0.0789  | 0.798   |
|           | Distal     | -0.0711 | 0.836   |
| In(3L)P   | Proximal   | -0.222  | 0.511   |

510

511

## 512 **Application to *D. melanogaster* Ancestry Clines**

513 Finally, we applied our method to ancestry clines between cosmopolitan and African  
514 ancestry *D. melanogaster*. Genomic variation across two ancestry clines have been studied  
515 previously [21,34,36,47]. In particular, the cline on the east coast of North America has  
516 been sampled densely by sequencing large pools of individuals to estimate allele  
517 frequencies, and previous work has shown that the overall proportion of African ancestry  
518 is strongly correlated with latitude [21]. Consistent with this observation, we found a  
519 significant negative correlation for all chromosome arms between proportion of average  
520 African ancestry and latitude ( $\rho = -0.891, -0.561, -0.912, -0.913, \text{ and } -0.755$ , for 2L, 2R,  
521 3L, 3R, and X respectively).

522

523 Although global ancestry proportions have previously been investigated in populations on  
524 this ancestry cline [21,34], these analyses neglected the potentially much richer  
525 information in patterns of LA across the genome. We therefore applied our method to these

526 samples. Because of the relatively recent dual colonization history of these populations and  
527 subsequent mixing of genomes, a genome-wide ancestry cline is expected [21]. However,  
528 loci that depart significantly in clinality from the genome-wide background levels may  
529 indicate that natural selection is operating on a site linked to that locus.

530

### 531 **Clinality of LA is Strongly Correlated with Recombination Rate**

532 Previous studies have shown that regions of low recombination are disproportionately  
533 resistant to admixture [7,17], a pattern that may reflect the fact that loci in low  
534 recombination regions are more likely to be tightly linked in an admixed population to a  
535 locus that is deleterious on admixed genetic backgrounds, or where one ancestry type is  
536 disfavored in the local environment of the admixed population. Consistent with these  
537 observations, we observed a significant positive correlation between the mean partial  
538 correlation with latitude and local recombination rates across the genome (Table 4).  
539 Furthermore, for only chromosome arm 3L did the 95% bootstrap confidence interval for  
540 the correlation between LA clinality and recombination rate overlap with 0 (Table 4). All  
541 other chromosome arms individually showed a significant positive correlation between LA  
542 clinality and recombination rates, indicating that the correlation between LA clines and  
543 local recombination rates in the genome is a robust relationship.

544

545 **Table 4.** Genome-wide and arm-specific correlation between recombination and the partial  
546 correlation between LA proportion and latitude, including Spearman's Correlation, the p-  
547 value for the observed correlation and the 95% bootstrap confidence interval.

| Chromosome Arm | rho | p | 2.5% Bootstrap CI | 97.5% Bootstrap CI |
|----------------|-----|---|-------------------|--------------------|
|----------------|-----|---|-------------------|--------------------|

|     |            |           |              |             |
|-----|------------|-----------|--------------|-------------|
| All | 0.1259436  | 0.0001167 | 0.084518662  | 0.20262254  |
| 2L  | 0.2434135  | 0.000691  | 0.08819046   | 0.346119464 |
| 2R  | 0.1839665  | 0.01633   | 0.032780198  | 0.3305687   |
| 3L  | -0.0986359 | 0.1213    | -0.207119717 | 0.059341699 |
| 3R  | 0.1649162  | 0.05151   | 0.000177156  | 0.323058668 |
| X   | 0.2672564  | 0.0002651 | 0.166917018  | 0.445182509 |

548

549 One interpretation of this observation that clinality of LA is strongly correlated with local  
550 recombination rates is that selection has had a substantial impact on the distribution of LA  
551 in the *D. melanogaster* ancestry cline on the east coast of North America, and lends further  
552 support to a growing consensus that low recombination regions may be especially unlikely  
553 to introgress between ancestral populations presumably because negatively selected loci  
554 have a greater effect on LA due to increased linkage between neutral and selected sites in  
555 low recombination genomic regions.

556

### 557 **Outlier LA Clines**

558 Selection within admixed populations may take several distinct forms. On the one hand,  
559 loci that are favorable in the admixed population—either because they are favored on an  
560 admixed genetic background, enhance reproductive success in an admixed population, or  
561 are favorable in the local environment—will tend to achieve higher frequencies, and we  
562 would expect these sites to have a more positive correlation with latitude than the genome-  
563 wide average. Conversely, loci that are disfavored within the admixed population may be  
564 expected to skew towards a more negative correlation with latitude.

565

566 Although it is not possible to distinguish between these hypotheses directly, a majority of  
567 evidence suggests that selection has primarily acted to remove African ancestry from the

568 largely Cosmopolitan genetic backgrounds found in this ancestry cline. First, abundant  
569 evidence suggests pre-mating isolation barriers between some African and cosmopolitan  
570 populations [62-64]. Second, there is strong post-mating isolation between populations on  
571 the ends of this cline [42,43]. Third, we report here a strong negative correlation between  
572 LA clines and local recombination rates (above). Finally, circumstantially, the local  
573 environment on the east coast of North America is perhaps most similar to Cosmopolitan  
574 than to African ancestral populations, which further suggests that Cosmopolitan alleles are  
575 likely favored through locally adaptive mechanisms. We therefore examined loci that are  
576 outliers for a negative partial correlation with latitude, as this is the expected pattern for  
577 African alleles that are disfavored in these populations.

578

579 There is an ongoing debate about the relative merits of an outlier approach versus more  
580 sophisticated models for detecting and quantifying selection in genome-wide scans. We  
581 believe that the difficulties of accurately estimating demographic parameters for this  
582 ancestry cline make the outlier approach most appealing for our purposes. Using our  
583 outlier approach, we identified 80 loci that showed the expected negative correlation with  
584 latitude (Figure 12). Although the specific statistical threshold that we employed is  
585 admittedly arbitrary, given the strength of evidence indicating widespread selection on  
586 ancestry in this species (above), we expected that the tail of the LA cline distribution would  
587 be enriched for the genetic targets of selection.

588

589 **Differences Among Chromosome Arms**



590 Due to the differences in inheritance, evolutionary theory predicts that selection will  
591 operate differently on the X chromosome relative to autosomal loci. Of specific relevance to  
592 this work, the large-X effect [65,66] is the observation that loci on the X chromosome  
593 contribute to reproductive isolation at a disproportionately high rate. Additionally, and  
594 potentially the cause of the large-X effect, due to the hemizyosity of X-linked loci, the X  
595 chromosome is expected to play a larger role in adaptive evolution, the so-called faster-X  
596 effect [67]. There is therefore reason to believe that the X chromosome will play a  
597 significant role in genetically isolating Cosmopolitan and African *D. melanogaster*.

598

599 Consistent with a larger role for the sex chromosomes in generating reproductive isolation  
600 or selective differentiation between *D. melanogaster* ancestral populations, we found that  
601 that the X chromosome has a lower mean African ancestry proportion than the autosomes  
602 in all populations. Furthermore, the X displayed a significantly higher rate of outlier LA loci  
603 than the autosomes (23 LA outliers on the X, 57 on the Autosomes,  $p = 0.0341$ , one-tailed  
604 exact Poisson test). Although consistent with evolutionary theory, differences between  
605 autosomal arms and the X chromosome may also be explained in part by differences in per  
606 base-pair recombination rates on the X chromosome than the autosomes, differences in  
607 power to identify LA clines, or by the disproportionately larger number of chromosomal  
608 inversions on the autosomes than on the X chromosome in these populations [55,60].

609

### 610 **Biological Properties of Outlier Loci**

611 We next applied gene ontology analysis to the set of outlier genes to identify common  
612 biological attributes that may suggest more specific organismal phenotypes underlying LA

613 clinal outliers. We found modest enrichments in eight GO categories without the set of  
614 clinal LA genes, however none remained significant after applying a multiple testing  
615 correction (Table 5). Nonetheless, given the abundance of evidence supporting a role for  
616 pre-mating isolation barriers between African and Cosmopolitan flies [62-64], the GO term,  
617 behavior, is of interest. Consistent with this observation, one of the strongest LA cline  
618 outliers, *egh*, has been conclusively linked to strong effects on male courtship behavior  
619 using a variety of genetic techniques [68]. Additionally, gene knockouts of CG43759,  
620 another LA cline outlier locus, have strong effects on inter-male aggressive behavior [69],  
621 and may also contribute to behavioral differences between admixed individuals. These loci  
622 are therefore appealing candidate genes for functional follow-up analyses, and illustrate  
623 the power of this LAI approach for identifying candidate genes associated with differential  
624 selection on ancestral variation in admixed populations.

625

626 **Table 5.** Significant gene ontology terms for LA clinal outlier loci.

| GO Term           | Description                                        | p-value  | enrichment score |
|-------------------|----------------------------------------------------|----------|------------------|
| <u>GO:0030054</u> | cell junction                                      | 1.33E-04 | 7.6              |
| <u>GO:0005850</u> | eukaryotic translation initiation factor 2 complex | 2.10E-04 | 83.58            |
| <u>GO:0017177</u> | glucosidase II complex                             | 3.49E-04 | 66.86            |
| <u>GO:0007016</u> | cytoskeletal anchoring at plasma membrane          | 8.86E-05 | 33.43            |
| <u>GO:0065008</u> | regulation of biological quality                   | 6.89E-04 | 2.63             |
| <u>GO:0007610</u> | behavior                                           | 7.10E-04 | 3.36             |
| <u>GO:0051049</u> | regulation of transport                            | 9.38E-04 | 5.28             |
| <u>GO:0032507</u> | maintenance of protein location in cell            | 9.84E-04 | 15.2             |

627

628 **Conclusion**

629 A growing number of next-generation sequencing projects produce low coverage data that  
630 cannot be used to unambiguously assign individual genotypes, but which can be analyzed  
631 probabilistically to account for uncertainty in individual genotypes [70-72]. However, most  
632 existing LAI methods require genotype data derived from diploid individuals. Hence, there  
633 is an apparent disconnect between existing LAI approaches and the majority of ongoing  
634 sequencing efforts. In this work, we developed the first framework for applying LAI to  
635 pileup read data, rather than error-free genotypes, and we have generalized this model to  
636 arbitrary sample ploidies. This method therefore has immediate applications to a wide  
637 variety of existing and ongoing sequencing projects, and we expect that this approach and  
638 extensions thereof will be valuable to a number of researchers.

639

640 For many applications, a parameter of central biological interest is the time since  
641 admixture began ( $t$ ). A wide variety of approaches have been developed that aim to  
642 estimate  $t$  and related parameters in admixed populations [26,28,29,73-76]. Many of these  
643 methods are based on an inferred distribution of tract lengths, however, inference of the  
644 ancestry tract length distribution is associated with uncertainty that is typically not  
645 incorporated in currently available methods for estimating  $t$ . Furthermore, incorrect  
646 assumptions regarding  $t$  has the potential to introduce biases during LAI. Hence, it is  
647 preferable to estimate demographic parameters such as the admixture time during the LAI  
648 procedure. Nonetheless, as noted above, although LAI using our method is robust to many  
649 deviations from the assumed model, admixture time estimates are sensitive to a variety of  
650 potential confounding factors and examining the resulting ancestry tract distributions after

651 LAI may be necessary to confirm that the assumed demographic model provides a  
652 reasonable fit to the data.

653

654 To our knowledge, this is the first method that attempts to simultaneously link LAI and  
655 population genetic parameter estimation directly, and we can envision many extensions of  
656 this approach that could expand the utility of this method to a broad variety of applications.  
657 For example, it is straightforward to accommodate additional reference populations (*e.g.*  
658 by assuming multinomial rather than binomial read sampling). Alternatively, any  
659 demographic or selective model that can be approximated as a Markov process could be  
660 incorporated—in particular, it is feasible to accommodate two-pulse admixture models and  
661 possibly models including ancestry tracts that are linked to positively selected sites. Such  
662 methods can be used to construct likelihood ratio tests of evolutionary models and for  
663 providing improved parameter estimates.

664

## 665 **Methods**

### 666 **Constructing Emissions Probabilities**

667 We model the ancestry using an HMM  $\{H_v\}$  with state space  $S = \{0, 1, \dots, n\}$ , where  $H_v = i$ ,  
668  $i \in S$ , indicates that in the  $v$ th position  $i$  chromosomes are from population 0 and  $n - i$   
669 chromosomes are from population 1. In the following, to simplify the notation and without  
670 loss of generality, we will omit the indicator for the position in the genome as the structure  
671 of the model is the same for all positions of equivalent ploidy. We assume each variant site  
672 is biallelic, with two alleles  $A$  and  $a$ , and the availability of reference panels from source  
673 populations 0 and 1 with total allelic counts  $C_{0a}$ ,  $C_{1a}$ ,  $C_{0A}$ , and  $C_{1A}$ , where the two subscripts

674 refer to population identity and allele, respectively. Also,  $C_0 = C_{0A} + C_{0a}$  and  $C_1 = C_{1A} + C_{1a}$ .  
675 Finally, we also assume we observe a pileup of  $r$  reads from the focal population, with  $r_A$   
676 and  $r_a$  reads for alleles  $A$  and  $a$  respectively ( $r = r_A + r_a$ ). The emission probability of state  
677  $i \in S$  of the process is then defined as  $e_i = \Pr(r_A, C_{0A}, C_{1A} \mid r, C_0, C_1, H = i, \varepsilon)$ , where  
678  $\varepsilon$  is an error rate. This probability can be calculated by summing over all possible  
679 genotypes in the admixed sample and over all possible population identities of the reads, as  
680 explained in the following section.

681  
682 The probability of obtaining  $r_0 (= r - r_1)$  reads, in the admixed population, from  
683 chromosomes of ancestry 0, given  $r$  and the hidden state  $H = i$ , and assuming no mapping or  
684 sequencing biases, is binomial,

$$685 \quad r_0 \mid H = i, n, r \sim \text{Bin}(r, i / n)$$

686  
687 These probabilities are pre-computed in our implementation for all possible values of  $i \in S$   
688 and  $r_0, 0 \leq r_0 \leq r$ . Similarly, for the reference populations, for  $j=0,1$ ,

$$690 \quad C_{jA} \mid C_j, f_j \sim \text{Bin}(C_j, f_j)$$

691  
692 where  $f_j$  is the allele frequency of allele  $A$  in population  $j$ . The analogous allelic counts in the  
693 admixed population, denoted  $C_{M0a}$ ,  $C_{M1a}$ ,  $C_{M0A}$ , and  $C_{M1A}$ , are unobserved (only reads are  
694 observed for the admixed population), but are also conditionally binomially distributed,  
695 *i.e.*:

696

697  $C_{M0A} | H = i, f_0 \sim \text{Bin}(i, f_0)$  and  $C_{M1A} | H = i, n, f_1 \sim \text{Bin}(n - i, f_1)$

698

699 Finally, in the absence of errors, and assuming no sequencing or mapping biases, the  
700 conditional probability of obtaining  $r_{0A}$  reads of allele  $A$  in the admixed population is

701

702  $r_{0A} | H = i, r_0, C_{M0A} \sim \text{Bin}(r_0, C_{M0A} / i)$

703

704 This probability can be expanded to include errors, in particular assuming a constant and  
705 symmetric error rate  $\varepsilon$  between major and minor allele, and assuming all reads with  
706 nucleotides that are not defined as major or minor are discarded, we have

707

708  $r_{0A} | H = i, r_0, C_{M0A}, \varepsilon \sim \text{Bin}(r_0, (1 - \varepsilon)C_{M0A}/i + \varepsilon(1 - C_{M0A}/i)).$

709

710 Using these expressions, and integrating over allele frequencies in the source populations,  
711 we have

712 
$$\Pr(r_{0A}, C_{0A} | r_0, C_0, n, H = i, \varepsilon) = \int_0^1 \sum_{k=0}^i \Pr(r_{0A} | H = i, r_0, C_{M0A} = k, \varepsilon) \Pr(C_{M0A} = k | H = i, f_0) p(f_0) df_0 =$$

713

$$\frac{C_0! i!}{(C_0 - C_{0A})! C_{0A}! (C_0 + i + 1)!} \sum_{k=0}^i \Pr(r_{0A} | H = i, r_0, C_{M0A} = k, \varepsilon) \frac{(C_0 - C_{0A} + i - k)! (C_{0A} + k)!}{(i - k)! k!}$$

714

715

716 assuming a uniform  $[0, 1]$  distribution for  $f_0$ . A similar expression is obtained for

717  $\Pr(r_{1A}, C_{1A}, |r_1, C_1, n, H = i, \varepsilon)$ , assuming  $f_1 \sim U[0,1]$ , and these expressions combine

718 multiplicatively to give

719

$$\Pr(r_A, C_{1A}, C_{0A}, |r_0, C_0, r_1, C_1, n, H = i, \varepsilon) =$$

$$720 \sum_{r_{0A}=\max\{0, r_A-r_1\}}^{\min\{r_0, r_A\}} \Pr(r_{0A}, C_{0A}, |r_0, C_0, n, H = i, \varepsilon) \Pr(r_{1A} = r_A - r_{0A}, C_{1A}, |r_1, C_1, n, H = i, \varepsilon),$$

721

722 and the emission probabilities become

723

$$724 \Pr(r_A, C_{0A}, C_{1A} | r, C_0, C_1, H = i, \varepsilon) =$$

$$\sum_{r_0=0}^r \Pr(r_0 | H = i, n, r) \Pr(r_A, C_{1A}, C_{0A}, |r_0, C_0, r_1 = r - r_0, C_1, n, H = i, \varepsilon)$$

725

726 Alternatively, if the sample genotypes are known with high confidence, i.e.  $C_{MA} = C_{M0A} + C_{M1A}$

727 is observed, the emission probabilities are the defined as

728

$$\Pr(C_{MA}, C_{0A}, C_{1A} | C_0, C_1, n, H = i) =$$

$$729 \binom{C_0}{C_{0A}} \binom{C_1}{C_{1A}} \sum_{k=\max\{C_{MA}-i, 0\}}^{\min\{n-i, C_{MA}\}} \int_0^1 \binom{n-i}{k} (f_0)^{C_{0A}+k} (1-f_0)^{C_0+n-i-C_{0A}-k} df_0 \int_0^1 \binom{i}{C_{MA}-k} (f_1)^{C_{MA}-k+C_{1A}} (1-f_1)^{C_1+i-C_{1A}-C_{MA}+k} df_1$$

$$= \sum_{k=\max\{C_{MA}-i, 0\}}^{\min\{n-i, C_{MA}\}} \frac{C_0! C_1! i! (n-i)! (C_{MA} + C_{1A} - k)! (C_{0A} + k)! (C_1 - C_{MA} - C_{1A} + i + k)! (C_0 - C_{0A} - i - k + n)!}{(C_0 - C_{0A})! C_{0A}! (C_1 - C_{1A})! C_{1A}! (C_{MA} - k)! k! (k + i - C_{MA})! (n - k - i)! (n - i + C_0 + 1)! (i + C_1 + 1)!}$$

730

731 These emissions probabilities are sometimes substantially faster to compute than those for  
732 short read pileups, especially when sequencing depths are high. However, the genotypes must  
733 be estimated with high accuracy for this approach to be valid. For applications with low read  
734 coverage, or with ploidy >2 for which many standard genotype callers are not applicable, it is  
735 usually preferable to use the pileup-based approach described above.

736

### 737 **Constructing Transition Probabilities**

738 We assume an admixed population, of constant size, with  $N$  diploid individuals, in which a  
739 proportion  $m$  of the individuals in the population were replaced with migrants  $t$   
740 generations before the time of sampling. Given these assumptions, and an SMC' model of  
741 the ancestral recombination graph [77], the rate of transition from ancestry 0 to 1, along  
742 the length of a single chromosome, is

743

$$744 \lambda_0 = 2Nm \left( 1 - e^{-\frac{t}{2N}} \right)$$

745

746 per Morgan [50]. Similarly, the rate of transition from ancestry 1 to 0 on a single  
747 chromosome is

748

$$749 \lambda_1 = 2N(1-m) \left( 1 - e^{-\frac{t}{2N}} \right)$$

750



751 per Morgan. Importantly, because these expressions are based on a coalescence model,  
 752 they account for the possibility that a recombination event occurs between two tracts of  
 753 the same ancestry type and the probability that the novel marginal genealogy will back-  
 754 coalesce with the previous genealogy [50]. Both events are expected to decrease the  
 755 number of ancestry switches along a chromosome and ignoring their contribution will  
 756 cause overestimation of the rate of change between ancestry types between adjacent  
 757 markers.

758

759 The transition rates are in units per Morgan, but can be converted to rates per bp, by  
 760 multiplying with the recombination rate in Morgans/bp,  $r_{bp}$  within a segment. The  
 761 transition probabilities of the HMM for a single chromosome,  $\mathbf{P}(l) = \{P_{ij}(l)\}, i, j \in S$ , between  
 762 two markers with a distance  $l$  between each other, is then approximately

763

$$764 \quad \mathbf{P}(l) = \begin{bmatrix} 1 - \lambda_0 r_{bp} & \lambda_0 r_{bp} \\ \lambda_1 r_{bp} & 1 - \lambda_1 r_{bp} \end{bmatrix}^l$$

765

766 using discrete distances, or

767

768

$$769 \quad \mathbf{P}(l) = \begin{bmatrix} \frac{\lambda_1}{\lambda_0 + \lambda_1} + \frac{\lambda_0}{\lambda_0 + \lambda_1} e^{-r_{bp}l(\lambda_0 + \lambda_1)} & \frac{\lambda_0}{\lambda_0 + \lambda_1} - \frac{\lambda_0}{\lambda_0 + \lambda_1} e^{-r_{bp}l(\lambda_0 + \lambda_1)} \\ \frac{\lambda_0}{\lambda_0 + \lambda_1} + \frac{\lambda_1}{\lambda_0 + \lambda_1} e^{-r_{bp}l(\lambda_0 + \lambda_1)} & \frac{\lambda_1}{\lambda_0 + \lambda_1} - \frac{\lambda_1}{\lambda_0 + \lambda_1} e^{-r_{bp}l(\lambda_0 + \lambda_1)} \end{bmatrix}$$

770

771 using continuous distances along the chromosome. Here, we use the continuous  
772 representation for calculations. We emphasize that the assumption of a Markovian process  
773 is known to be incorrect [50], in fact admixture tracts tend to be more spatially correlated  
774 than predicted by a Markov model, and the degree and structure of the correlation depends  
775 on the demographic model [50]. Deviations from a Markovian process may cause biases in  
776 the estimation of parameters such as  $t$ .

777

778 The Markov process defined above is applicable to a single chromosome. We now want to  
779 approximate a similar process for a sample of  $n$  chromosomes from a single sequencing  
780 pool. The true process is quite complicated, and we choose for simplicity to approximate  
781 the process for  $n$  chromosomes sampled from one population, as the union of  $n$   
782 independent chromosomal processes. We will later quantify biases arising due to this  
783 independence assumption using simulations. Under the independence assumption, the  
784 transition probability from  $i$  to  $j$  is simply the probability of  $l$  transitions from state 1 to  
785 state 0 in the marginal processes and  $j - i + l$  transitions from state 0 to state 1, summed  
786 over all admissible values of  $l$ , i.e.,

787

788 
$$\Pr(H_{v+k} = j \mid H_v = i) = \sum_{l=\max\{0, i-j\}}^{\min\{n-j, i\}} \binom{n-i}{j-i+l} (P_{01}(k))^{j-i+l} (1-P_{01}(k))^{n-j+i-l} \binom{i}{l} (P_{10}(k))^l (1-P_{10}(k))^{i-l}$$

789

790 Although this procedure can be computationally expensive when there are many markers,  
791 read depths are high, and especially when  $n$  is large, in our implementation, we reduce the  
792 compute time by pre-calculating and storing all binomial coefficients.

793

#### 794 **Estimating Time Since Admixture**

795 A parameter of central biological interest, that is often unknown in practice, is the time  
796 since the initial admixture event ( $t$ ). We therefore use the HMM representation to provide  
797 maximum likelihood estimates of  $t$  using the forward algorithm to calculate the likelihood  
798 function. As this is a single parameter optimization problem for a likelihood function with a  
799 single mode, optimization can be performed using a simple golden section search [78].

800 Default settings for this optimization in our software, including the search range maxima  
801 defaults,  $t_{max}$  and  $t_{min}$ , are documented in the C++ HMM source code provided at  
802 [https://github.com/russcd/Ancestry\\_HMM](https://github.com/russcd/Ancestry_HMM).

803

#### 804 **Posterior Decoding**

805 After either estimating or providing a fixed value of the time since admixture to the HMM,  
806 we obtained the posterior distribution for all variable sites considered in our analysis using  
807 the forward-backward algorithm, and we report the full posterior distribution for each  
808 marker along the chromosome.

809

#### 810 **Simulating Ancestral Polymorphism**

811 To validate our HMM, we generated sequence data for each of two ancestral populations  
812 using the coalescent simulator MACS [79]. We sought to generate data that could be

813 consistent with that observed in Cosmopolitan and African populations of *D. melanogaster*,  
814 which has been studied previously in a wide variety of contexts [2,11,31-33]. We used the  
815 command line “macs 400 10000000 -i 1 -h 1000 -t 0.0376 -r 0.171 -c 5 86.5 -I 2 200 200 0 -  
816 en 0 2 0.183 -en 0.0037281 2 0.000377 -en 0.00381 2 1 -ej 0.00382 2 1 -eN 0.0145 0.2” to  
817 generate genotype data. This will produce 200 samples of ancestry 0 and 200 samples of  
818 ancestry 1 on a 10mb chromosome—*i.e.* this should resemble genotype data for about half  
819 of an autosomal chromosome arm in *D. melanogaster*. Unless otherwise stated below, we  
820 then sampled the first 50 chromosomes from each ancestral population as the ancestral  
821 population reference panel, whose genotypes are assumed to be known with low error  
822 rates. The sample size was chosen because it is close to the size of the reference panel that  
823 we obtained in our application of this approach to *D. melanogaster* (below).

824  
825 To evaluate the performance of our method on data consistent with human populations, we  
826 simulated data that could be consistent with that observed for modern European and  
827 African human populations. Specifically, we simulated the model of [80] using the  
828 command line “macs 200 1e8 -I 3 100 100 0 -n 1 1.682020 -n 2 3.736830 -n 3 7.292050 -eg  
829 0 2 116.010723 -eg 1e-12 3 160.246047 -ma x 0.881098 0.561966 0.881098 x 2.797460  
830 0.561966 2.797460 x -ej 0.028985 3 2 -en 0.028986 2 0.287184 -ema 0.028987 3 x  
831 7.293140 x 7.293140 x x x x x -ej 0.197963 2 1 -en 0.303501 1 1 -t 0.00069372 -r  
832 0.00069372”. Admixture between ancestral populations was then simulated as described  
833 below.

834

835 **Simulating Admixed Populations**

836 Although it is commonly assumed that admixture tract lengths can be modeled as  
837 independent and identically distributed exponential random variables (e.g. [26,29] and in  
838 this work, above), this assumption is known to be incorrect as ancestry tracts are neither  
839 exponentially distributed, independent across individuals, nor identically distributed along  
840 chromosomes [50]. We therefore aim to determine what bias violations of this assumption  
841 will have on inferences obtained from this model. Towards this, we used SELAM [81] to  
842 simulate admixed populations under the biological model described above. Because this  
843 program simulated admixture in forward time, it generates the full pedigree-based  
844 ancestral recombination graph, and is therefore a conservative test of our approach  
845 relative to the coalescent which is known to produce incorrect ancestry tract distributions  
846 for short times [50]. Briefly, we initialized each admixed population simulation with a  
847 proportion,  $m$ , of ancestry from ancestral population 1, and a proportion  $1-m$  ancestry from  
848 ancestral population 0. Unless otherwise stated, all simulations were conducted with  
849 neutral admixture and a hermaphroditic diploid population of size 10,000.

850

851 We then assigned the additional, non-reference chromosomes from the coalescent  
852 simulations, to each ancestry tract produced in SELAM simulations according to their local  
853 ancestry along the chromosome. In this way, each chromosome is a mosaic of the two  
854 ancestral subpopulations. See, *e.g.* [2], for a related approach for simulating genotype data  
855 of admixed chromosomes.

856

857 **Pruning Ancestral Linkage Disequilibrium**

858 Correlations induced by LD between markers within ancestral populations violates a  
859 central assumption of the Markov model framework. Although it may be feasible to  
860 explicitly model linkage within ancestral populations, when ancestral populations have  
861 relatively little LD, such as those of *D. melanogaster*, another effective approach is to  
862 discard sites that are in strong LD in the ancestral populations. Hence, to avoid this  
863 potential confounding aspect of the data, we first computed LD between all pairs of  
864 markers within each reference panel that are within 0.01 centimorgans of one another. We  
865 then discarded one of each pair of sites where  $|r|$  in either reference panel exceeded a  
866 particular threshold, and we decreased this threshold until we obtained an approximately  
867 unbiased estimate of the time since admixture estimates of the HMM. This approach differs  
868 from a previous method, LAMPanc, where LD is pruned from within admixed samples (see  
869 also below).

870

### 871 **Simulating Sequence Data**

872 We first identified all sites where the allele frequencies of the ancestral populations differ  
873 by at least 20% within the reference panels. We excluded weakly differentiated sites to  
874 decrease runtime and because these markers carry relatively little information about the  
875 LA at a given site. Then, to generate data similar to what would be produced using Illumina  
876 sequencing platforms, we simulated allele counts for each sample, by first drawing the  
877 depth at a given site from a Poisson distribution. In most cases and unless otherwise stated,  
878 the mean of this distribution is set to be equal to the sample ploidy. We did this to ensure  
879 equivalent sequencing depth per chromosome regardless of pooling strategy, and because  
880 this depth is sufficiently low that high quality genotypes cannot be determined. We then

881 generated set of simulated aligned bases via binomial sampling from the sample allele  
882 frequency and included a uniform error rate of 0.5% for both alleles at each site.

883

884 Unless otherwise stated, we simulated a total of 40 admixed chromosomes. The HMM can  
885 perform LAI on more than one sample at a time, and we therefore included all samples  
886 when running it. Hence, we used 40 haploid, 20 diploid, 4 pools of 10 chromosomes, and 2  
887 pools of 20 chromosomes for most comparisons of accuracy reported below, unless  
888 otherwise stated.

889

## 890 **Accuracy Statistics**

891 To evaluate the performance of the HMM, we computed four statistics. First, we compute  
892 the proportion of sites where the true state is within the 95% posterior credible interval,  
893 where ideally, this proportion would be equal to or greater than 0.95. Second, we compute  
894 the mean posterior error, the average distance between the posterior distribution of  
895 hidden states and the true state

896

$$897 \quad E = \frac{\sum_{v=0}^S \sum_{i=0}^n p(H_v = i | \mathbf{r}) |i - I_v|}{k}$$

898

899 Here  $S$  is the total number of sites,  $I_v$  is the true state at site  $v$ , and  $\mathbf{r}$  is all the combined read  
900 data. Third, we also report the proportion of sites where the maximum likelihood estimate  
901 of the hidden state is equal to the true ancestry state. Finally, as an indicator of the  
902 specificity of our approach, we also report the average width of the 95% credible interval.

903

## 904 **Deviations from the Assumed Neutral Demographic Model**

905 A potential issue with this framework is that the assumptions underlying the transition  
906 matrixes and related time of admixture estimation procedure is likely to be violated in a  
907 number of biologically relevant circumstances. We therefore simulated populations  
908 wherein individuals of ancestral population 1 began entering a population entirely  
909 composed of individuals from ancestral population 0, at a time  $t$  generations before the  
910 present, at a constant rate that is sustained across all subsequent generations until the time  
911 of sampling. That is, additional unadmixed individuals of ancestry 1 migrate each  
912 generation from  $t$  until the present.

913

914 Natural selection acting on admixed genetic regions has been inferred in a wide variety of  
915 systems (*e.g.* [5,7,13,17,18]), and is expected to have pronounced effects on the distribution  
916 of LA among individuals within admixed populations. Here again, this aspect of biologically  
917 realistic populations will tend to violate central underlying assumptions of the model  
918 assumed in this work. Towards this, we simulated admixed populations with a single pulse  
919 of admixture  $t$  generations prior to the time of sampling. We then incorporated selection at  
920 2,5,10, and 20 loci at locations uniformly distributed along the length of the chromosome  
921 arm. All selected loci were assumed to be fixed within each ancestral population. Selection  
922 was additive and selective coefficients were assigned based on a uniform [0.005, 0.05]  
923 distribution to either ancestry 0 or 1 alleles with equal probability. As above, these  
924 simulations were conducted using SELAM [81].

925



926 For both selected and continuous migration simulations, we then performed the genotype  
927 and read data simulation procedure, and reran our HMM as described above. We  
928 performed 10 simulations for each treatment.

929

### 930 **Comparisons to LAMPanc**

931 We next sought to compare our method to a commonly used local ancestry inference  
932 method, LAMPanc [23]. Towards this, we again simulated data using MACS and SELAM as  
933 described above. For these comparisons, the initial ancestry contribution was 0.5 and the  
934 number of generations since admixture varied between 5 and 1000. For comparison, we  
935 supplied LAMPanc and our program the correct time since admixture and ancestry  
936 proportions, as these are required parameters for LAMPanc. We also supplied the program  
937 error free genotypes, another requirement of LAMPanc, whereas we supplied our HMM  
938 with read data simulated as described above. We then ran LAMPanc under default  
939 parameters, and we also reran LAMPanc using LD pruning within the reference panels, as  
940 we do in our method, instead of the default LD pruning implemented in LAMPanc.

941

### 942 **Analysis of Inuit Genotype Data**

943 To demonstrate that LAI methods can be biased by the arbitrary selection of the time since  
944 admixture, we analyzed a dataset of SNP-array genotype data from Greenlandic Inuits.  
945 These data are described in detail elsewhere [51,52]. This population has received some  
946 admixture from a European source population, and the authors had previously used RFMix  
947 [24] to perform LAI, and found some sensitivity to the assumed time since admixture (J.  
948 Crawford *pers. Comm.*). We analyzed data from chromosome 10 using RFMix v1.5.4 [24] as

949 described in Moltke *et al.* [52] assuming admixture occurred either 5 or 20 generations ago.  
950 We subsequently analyzed chromosome 10 using our HMM including the genotype-  
951 analysis emissions probabilities and assuming a genotype error rate of 0.2%. For our  
952 analysis we identified the LD cutoff that is appropriate for these data as described above.

953

### 954 **Generating *D. melanogaster* Reference Populations**

955 To generate reference panels, we used a subset of the high quality *D. melenaogaster*  
956 assemblies that have been described previously in Pool *et al.* (2012) and Lack *et al.* (2015).  
957 As in the local ancestry analysis of Pool (2015), we used the French population. For our  
958 African reference panel, we selected a subset of the Eastern and Western African  
959 populations (CO, RG, RC, NG, UG, GA, GU) and grouped them into a single population for the  
960 purposes of our analysis. We elected to combine populations so that we would have a  
961 larger reference panel of African populations for this analysis, this solution may be justified  
962 because these *D. melanogaster* populations are only weakly genetically differentiated  
963 [2,21,82], particularly after common inversion-bearing chromosomes are removed from  
964 analyses. Specific individuals were selected for inclusion in the African reference panel if  
965 previous work found they have relatively little cosmopolitan ancestry (*i.e.* below 0.2  
966 genome-wide in [2]).

967

968 Because of their powerful effects on recombination, chromosomal inversions are known to  
969 have substantial impacts on the distribution of genetic variants on chromosomes  
970 containing chromosomal inversions in *D. melanogaster* [2,54]. For this reason, we removed  
971 all common inversion-bearing chromosome arms from the reference populations [83].

972 Nonetheless, it is clear that chromosomal inversions are present in the pool-seq samples  
973 [55]. Although the inversions certainly violate key assumptions of our model—particularly  
974 the transmission probabilities—given that our approach is robust to a many perturbations,  
975 we expect the LA within inverted haplotypes can be estimated with reasonable confidence,  
976 and the overall LAI procedure will still perform adequately with low frequencies of  
977 chromosomal-inversion bearing chromosomes present within these samples.

978

979 Although these reference populations are believed to have relatively little admixture, some  
980 admixture is likely to remain within these samples [2]. To mitigate this potential issue, we  
981 first applied our HMM to each reference population using the genotype-based emissions  
982 probabilities (above). Calculated across all individuals, we found that our maximum  
983 likelihood ancestry estimates were identical with those of Pool *et al.* (2012) at 96.2% of  
984 markers considered in our analysis. The differences between the results of these methods  
985 may reflect differences in the methodology of LAI or differences in the reference panels.  
986 Nonetheless, the broad concordance suggests the two methods are yielding similar overall  
987 results. We masked all sites where the posterior probability of non-native ancestry was  
988 greater than 0.5 within each reference individual's genome. These masked sequences were  
989 then used as the reference panel for the analyses of poolseq data below.

990

### 991 **Ancestry Cline Sequence Data Analysis**

992 We acquired pooled sequencing data from six populations from the east coast of the United  
993 States. The generation of these samples, sequencing data, and accession numbers are  
994 described in detail in [21,36]. Briefly, the samples are comprised of individuals drawn from

995 natural populations and sequenced in relatively large pools of 66-232 chromosomes. We  
996 aligned all data using BWA v0.7.9a-r786 [84] using the 'MEM' function and the default  
997 program parameters. For all alignments, we used version 5 of the *D. melanogaster*  
998 reference genome [85] in order to make our analysis and coordinates compatible with the  
999 *Drosophila* genome nexus [83]. We then realigned all reads using the indelrealigner tool  
1000 within the GATK package [72], and we extracted the sequence pileup using samtools  
1001 mpileup v1.1 [86] using the program's default parameters.

1002

1003 We extracted sites at ancestry informative positions within the reference panels, where we  
1004 required that the reference panel have a minimum of 50% of individuals with a high quality  
1005 genotype call in both Cosmopolitan and African reference populations. As above, ancestry  
1006 informative sites were defined as those with a minimum of 20% difference in allele  
1007 frequencies between the reference panels used, and we retained only ancestry informative  
1008 sites for our analyses. We then produced global ancestry estimates for each chromosome  
1009 arm separately for each sample using the method of Bergland *et al.* (2016). We ran our  
1010 HMM for each chromosome arm and each population, and we provided the program this  
1011 estimate of the ancestry proportion and the time since admixture, 1593 generations [17].  
1012 We elected to provide the time since admixture because we have found that this parameter  
1013 is difficult to estimate in relatively large pools (see Results). However, the program can  
1014 accurately estimate LA in high ploidy samples even when the time since admixture cannot  
1015 be estimated correctly (see Results).

1016

1017 **Correlation with Local Recombination Rates**

1018 To assess the correlation between local recombination rates and clinality of LA clines in the  
1019 genome, we employed a regression approach. First, we computed the mean partial  
1020 correlation between latitude and local ancestry in windows of 100 ancestry informative  
1021 markers. We then annotated the recombination rate in the midpoint of that genomic  
1022 window, where as above, we used the recombination rate estimates of [87]. We computed  
1023 Spearman's correlation between local recombination rates and the mean partial correlation  
1024 between LA and latitude for the whole genome and for each chromosome arm  
1025 independently. We also estimated confidence intervals using 1000 block-bootstrap samples  
1026 using window sizes of 100 SNPs.

1027

### 1028 **Identifying LA Cline Outliers**

1029 To detect loci that show evidence for steeper ancestry clines than the genomic average, we  
1030 first computed the Spearman's rank correlation between mean ancestry proportions and  
1031 latitude for each chromosome arm separately. Then, for each site for which we obtained a  
1032 posterior ancestry distribution for all samples, we computed the partial Spearman's rank  
1033 correlation between the posterior ancestry mean and latitude while correcting for the  
1034 correlation between latitude and the overall ancestry proportion. We then computed the  
1035 probability of obtaining the observed partial correlation in R, which implements the  
1036 approach of [88], and we retained those sites where the probability of the partial  
1037 correlation between local ancestry and latitude was less than 0.005 as significant in our  
1038 analysis. Although this cutoff is arbitrary, given the strong evidence for local adaptation  
1039 and reproductive isolation in these populations [42,43,89], the tail of the LA cline  
1040 distribution will likely be enriched for sites experiencing selection on this ancestry

1041 gradient. Due to linkage, adjacent sites show strong autocorrelation. We therefore selected  
1042 the local optima for a given clinally significant LA segment (*i.e.* a tract where all positions  
1043 are significantly correlated with latitude at our threshold) and retained these for analyses  
1044 of outlier loci. Finally, to further reduce the effect of autocorrelation, we retained only  
1045 those local optima for which no other optimum had a stronger correlation with latitude  
1046 within 100,000bp on either side on the site.

1047

### 1048 **Gene Ontology Analyses**

1049 We performed Gene-ontology (GO) analyses of the set of clinal outlier loci where the  
1050 background set was all genes located on any euchromatic chromosome arms in the *D.*  
1051 *melanogaster* genome. The foreground set was defined as the gene intersected by a LA  
1052 outlier local optimum, or the nearest gene to a local optimum. All GO analyses were  
1053 performed using GOrilla [90].

1054

### 1055 **Acknowledgements**

1056 We thank Tyler Linderoth, Shelbi Russell and members of the Nielsen and Slatkin labs for  
1057 helpful comments. We also thank Jacob Crawford for providing Inuit polymorphism data  
1058 and for providing the observation that LAI inference depended heavily on *t*.

1059

### 1060 **References**

- 1061 1. Kronforst MR, Young LG, Blume LM, Gilbert LE. Multilocus analyses of admixture and  
1062 introgression among hybridizing *Heliconius* butterflies. *Evolution*. 2006;60: 1254–16.  
1063 doi:10.1554/06-005.1

- 1064 2. Pool JE, Corbett-Detig RB, Sugino RP, Stevens KA, Cardeno CM, Crepeau MW, et al.  
1065 Population genomics of sub-Saharan *Drosophila melanogaster*: African diversity and  
1066 non-African admixture. *PLoS Genet.* 2012;8: e1003080–24.  
1067 doi:10.1371/journal.pgen.1003080
- 1068 3. Hufford MB, Lubinsky P, Pyhäjärvi T, Devengenzo MT, Ellstrand NC, Ross-Ibarra J.  
1069 The genomic signature of crop-wild introgression in maize. *PLoS Genet.* 2013;9:  
1070 e1003477–13. doi:10.1371/journal.pgen.1003477
- 1071 4. Brandvain Y, Kenney AM, Flagel L, Coop G, Sweigart AL. Speciation and introgression  
1072 between *Mimulus nasutus* and *Mimulus guttatus*. *PLoS Genet.* 2014;10: e1004410–  
1073 15. doi:10.1371/journal.pgen.1004410
- 1074 5. Rieseberg LH, Raymond O, Rosenthal DM, Lai Z, Livingstone K, Nakazato T, et al.  
1075 Major ecological transitions in wild sunflowers facilitated by hybridization. *Science.*  
1076 2003;301: 1211–1216. doi:10.1126/science.1086949
- 1077 6. Green RE, Krause J, Briggs AW, Maricic T, Stenzel U, Kircher M, et al. A draft sequence  
1078 of the neandertal genome. *Science.* 2010;328: 710–722.  
1079 doi:10.1126/science.1188021
- 1080 7. Sankararaman S, Mallick S, Dannemann M, Prüfer K, Kelso J, Pääbo S, et al. The  
1081 genomic landscape of Neanderthal ancestry in present-day humans. *Nature.*  
1082 2014;507: 354–357. doi:10.1038/nature12961
- 1083 8. Price AL, Patterson NJ, Plenge RM, Weinblatt ME, Shadick NA, Reich D. Principal

- 1084 components analysis corrects for stratification in genome-wide association studies.  
1085 Nat Genet. 2006;38: 904–909. doi:10.1038/ng1847
- 1086 9. Lohmueller KE, Pearce CL, Pike M, Lander ES, Hirschhorn JN. Meta-analysis of genetic  
1087 association studies supports a contribution of common variants to susceptibility to  
1088 common disease. Nat Genet. 2003;33: 177–182. doi:10.1038/ng1071
- 1089 10. Freedman ML, Reich D, Penney KL, McDonald GJ, Mignault AA, Patterson N, et al.  
1090 Assessing the impact of population stratification on genetic association studies. Nat  
1091 Genet. 2004;36: 388–393. doi:10.1038/ng1333
- 1092 11. Caracristi G, Schlotterer C. Genetic differentiation between American and European  
1093 *Drosophila melanogaster* populations could be attributed to admixture of African  
1094 alleles. Mol Biol Evol. 2003;20: 792–799. doi:10.1093/molbev/msg091
- 1095 12. Kolbe JJ, Glor RE, Schettino LR, Lara AC, Larson A. Genetic variation increases during  
1096 biological invasion by a Cuban lizard. Nature. 2004;431: 177–181.
- 1097 13. Consortium THG, Consortium G. Butterfly genome reveals promiscuous exchange of  
1098 mimicry adaptations among species. Nature. 2012;487: 94–98.  
1099 doi:10.1038/nature11041
- 1100 14. Racimo F, Sankararaman S, Nielsen R, Huerta-Sanchez E. Evidence for archaic  
1101 adaptive introgression in humans. Nat Rev Genet. 2015;16: 359–371.  
1102 doi:10.1038/nrg3936
- 1103 15. Juric I, Aeschbacher S, Coop G. The strength of selection against Neanderthal



- 1104            introgression. *bioRxiv*. 2015 Oct pp. 1–24. doi:10.1101/030148
- 1105    16.    Harris K, Nielsen R. The genetic cost of neanderthal introgression. *Genetics*. *Genetics*;  
1106            2016;203: 881–891. doi:10.1534/genetics.116.186890
- 1107    17.    Pool JE. The mosaic ancestry of the *Drosophila* Genetic Reference Panel and the *D.*  
1108            *melanogaster* reference genome reveals a network of epistatic fitness interactions.  
1109            *Mol Biol Evol*. 2015; msv194–16. doi:10.1093/molbev/msv194
- 1110    18.    Schumer M, Cui R, Powell DL, Dresner R, Rosenthal GG, Andolfatto P. High-resolution  
1111            mapping reveals hundreds of genetic incompatibilities in hybridizing fish species.  
1112            *eLife*. 2014;3: 610–21. doi:10.7554/eLife.02535
- 1113    19.    Pritchard JK, Stephens M, Donnelly P. Inference of population structure using  
1114            multilocus genotype data. *Genetics*. 2000;155: 945–959.
- 1115    20.    Skotte L, Korneliussen TS, Albrechtsen A. Estimating individual admixture  
1116            proportions from next generation sequencing data. *Genetics*. 2013;195: 693–702.  
1117            doi:10.1534/genetics.113.154138/-/DC1
- 1118    21.    Bergland AO, Tobler R, González J, Schmidt P, Petrov D. Secondary contact and local  
1119            adaptation contribute to genome-wide patterns of clinal variation in *Drosophila*  
1120            *melanogaster*. *Mol Ecol*. 2016;25: 1157–1174. doi:10.1111/mec.13455
- 1121    22.    Falush D, Stephens M, Pritchard JK. Inference of population structure using  
1122            multilocus genotype data: linked loci and correlated allele frequencies. *Genetics*.  
1123            2003;164: 1567–1587.

- 1124 23. Sankararaman S, Sridhar S, Kimmel G, Halperin E. Estimating local ancestry in  
1125 admixed populations. *Am J Hum Genet.* 2008;82: 290–303.  
1126 doi:10.1016/j.ajhg.2007.09.022
- 1127 24. Maples BK, Gravel S, Kenny EE, Bustamante CD. RFMix: a discriminative modeling  
1128 approach for rapid and robust local-ancestry inference. *Am J Hum Genet.* 2013;93:  
1129 278–288. doi:10.1016/j.ajhg.2013.06.020
- 1130 25. Baran Y, Pasaniuc B, Sankararaman S, Torgerson DG, Gignoux C, Eng C, et al. Fast and  
1131 accurate inference of local ancestry in Latino populations. *Bioinformatics.* 2012;28:  
1132 1359–1367. doi:10.1093/bioinformatics/bts144
- 1133 26. Pool JE, Nielsen R. Inference of historical changes in migration rate from the lengths  
1134 of migrant tracts. *Genetics.* 2009;181: 711–719. doi:10.1534/genetics.108.098095
- 1135 27. Koopman W, Li Y, Coart E. Linked vs. unlinked markers: multilocus microsatellite  
1136 haplotype-sharing as a tool to estimate gene flow and introgression. *Mol Ecol.*  
1137 2007;16: 243–256. doi:10.1111/j.1365-294X.2006.03137.x
- 1138 28. Patterson N, Hattangadi N, Lane B. Methods for high-density admixture mapping of  
1139 disease genes. *Am J Hum Genet.* 2004;74: 979–1000.
- 1140 29. Gravel S. Population Genetics Models of Local Ancestry. *Genetics.* 2012;191: 607–  
1141 619. doi:10.1534/genetics.112.139808
- 1142 30. Consortium 1GP, BGI-Shenzhen, European Bioinformatics Institute, Illumina,  
1143 Hospital BAW, College B, et al. An integrated map of genetic variation from 1,092

- 1144 human genomes. *Nature*. 2012. doi:10.1038/nature11632
- 1145 31. Haddrill PR, Thornton KR, Charlesworth B, Andolfatto P. Multilocus patterns of  
1146 nucleotide variability and the demographic and selection history of *Drosophila*  
1147 *melanogaster* populations. *Genome Res*. 2005;15: 790–799. doi:10.1101/gr.3541005
- 1148 32. Thornton K, Andolfatto P. Approximate Bayesian inference reveals evidence for a  
1149 recent, severe bottleneck in a Netherlands population of *Drosophila melanogaster*.  
1150 *Genetics*. 2006;172: 1607–1619. doi:10.1534/genetics.105.048223
- 1151 33. Li H, Stephan W. Inferring the demographic history and rate of adaptive substitution  
1152 in *Drosophila*. *PLoS Genet*. 2006;2: e166. doi:10.1371/journal.pgen
- 1153 34. Duchon P, Živković D, Hutter S, Stephan W. Demographic inference reveals African  
1154 and European admixture in the North American *Drosophila melanogaster*  
1155 population. *Genetics*. 2013;193: 291–301. doi:10.1534/genetics.112.145912/-/DC1
- 1156 35. Langley CH, Stevens K, Cardeno C, Lee YCG, Schrider DR, Pool JE, et al. Genomic  
1157 variation in natural populations of *Drosophila melanogaster*. *Genetics*. 2012;192:  
1158 533–598. doi:10.1534/genetics.112.142018
- 1159 36. Bergland AO, Behrman EL, O'Brien KR, Schmidt PS, Petrov DA. Genomic evidence of  
1160 rapid and stable adaptive oscillations over seasonal time scales in *Drosophila*. *PLoS*  
1161 *Genet*. 2014;10: e1004775–19. doi:10.1371/journal.pgen.1004775
- 1162 37. Schrider DR, Hahn MW, Begun DJ. Parallel evolution of copy-number variation across  
1163 continents in *Drosophila melanogaster*. *Mol Biol Evol*. 2016;33: 1308–1316.

- 1164           doi:10.1093/molbev/msw014
- 1165    38.   Reinhardt JA, Kolaczkowski B, Jones CD, Begun DJ, Kern AD. Parallel geographic  
1166           variation in *Drosophila melanogaster*. *Genetics*. 2014;197: 361–373.  
1167           doi:10.1534/genetics.114.161463/-/DC1
- 1168    39.   Fabian DK, Kapun M, Nolte V, Kofler R, Schmidt PS, Schlotterer C, et al. Genome-wide  
1169           patterns of latitudinal differentiation among populations of *Drosophila*  
1170           *melanogaster* from North America. *Mol Ecol*. 2012;21: 4748–4769.  
1171           doi:10.1111/j.1365-294X.2012.05731.x
- 1172    40.   Oakeshott JG, Gibson JB, Anderson PR, Knibb WR. Alcohol dehydrogenase and  
1173           glycerol-3-phosphate dehydrogenase clines in *Drosophila melanogaster* on different  
1174           continents. *Evolution*. 1982;36: 86–96.
- 1175    41.   Berry A, Kreitman M. Molecular analysis of an allozyme cline: alcohol dehydrogenase  
1176           in *Drosophila melanogaster* on the east coast of North America. *Genetics*. 1993;134:  
1177           869-893.
- 1178    42.   Yukilevich R, True JR. African morphology, behavior, and pheromones underlie  
1179           incipient sexual isolation between US and Caribbean *Drosophila melanogaster*.  
1180           *Evolution*. 2008;62: 2807–2828. doi:10.1111/j.1558-5646.2008.00488.x
- 1181    43.   Lachance J, True JR. X-autosome incompatibilities in *Drosophila melanogaster*: test of  
1182           Haldane's rule and geographic patterns within species. *Evolution*. 2010;64: 3035–  
1183           3046. doi:10.1111/j.1558-5646.2010.01028.x

- 1184 44. Corbett-Detig RB, Zhou J, Clark AG, Hartl DL, Ayroles JF. Genetic incompatibilities are  
1185 widespread within species. *Nature*. 2013;504: 135–137. doi:10.1038/nature12678
- 1186 45. Kofler R, Betancourt AJ, Schlotterer C. Sequencing of Pooled DNA Samples (Pool-Seq)  
1187 Uncovers Complex Dynamics of Transposable Element Insertions in *Drosophila*  
1188 *melanogaster*. *PLoS Genet*. 2012;8: e1002487–16.  
1189 doi:10.1371/journal.pgen.1002487
- 1190 46. terWengel PO, Kapun M, Nolte V, Kofler R, Flatt T, Schlotterer C. Adaptation of  
1191 *Drosophila* to a novel laboratory environment reveals temporally heterogeneous  
1192 trajectories of selected alleles. *Mol Ecol*. 2012;21: 4931–4941. doi:10.1111/j.1365-  
1193 294X.2012.05673.x
- 1194 47. Kolaczkowski B, Kern AD, Holloway AK, Begun DJ. Genomic differentiation between  
1195 temperate and tropical Australian populations of *Drosophila melanogaster*. *Genetics*.  
1196 2011;187: 245–260. doi:10.1534/genetics.110.123059
- 1197 48. Kapun M, Schalkwyk H, McAllister B, Flatt T, Schlotterer C. Inference of chromosomal  
1198 inversion dynamics from Pool-Seq data in natural and laboratory populations of  
1199 *Drosophila melanogaster*. *Mol Ecol*. 2014;23: 1813–1827. doi:10.1111/mec.12594
- 1200 49. Zhu Y, Bergland AO, González J, Petrov DA. Empirical validation of pooled whole  
1201 genome population re-sequencing in *Drosophila melanogaster*. *PLoS ONE*. 2012;7:  
1202 e41901. doi:10.1371/journal.pone.0041901
- 1203 50. Liang M, Nielsen R. The lengths of admixture tracts. *Genetics*. 2014;197: 953–967.

- 1204            doi:10.1534/genetics.114.162362
- 1205    51.    Moltke I, Grarup N, Jørgensen ME, Bjerregaard P, Treebak JT, Fumagalli M, et al. A  
1206            common Greenlandic TBC1D4 variant confers muscle insulin resistance and type 2  
1207            diabetes. *Nature*. 2014;512: 190–193. doi:10.1038/nature13425
- 1208    52.    Moltke I, Fumagalli M, Korneliussen TS. Uncovering the genetic history of the  
1209            present-day Greenlandic population. *Am J Hum Genet*. 2015;96: 54–69.  
1210            doi:10.1016/j.ajhg.2014.11.012
- 1211    53.    Voight BF, Kang HM, Ding J, Palmer CD, Sidore C, Chines PS, et al. The metabochip, a  
1212            custom genotyping array for genetic studies of metabolic, cardiovascular, and  
1213            anthropometric traits. *PLoS Genet*. 2012;8: e1002793–12.  
1214            doi:10.1371/journal.pgen.1002793
- 1215    54.    Corbett-Detig RB, Hartl DL. Population genomics of inversion polymorphisms in  
1216            *Drosophila melanogaster*. *PLoS Genet*. 2012;8: e1003056–15.  
1217            doi:10.1371/journal.pgen.1003056
- 1218    55.    Kapun M, Fabian DK, Goudet J, Flatt T. Genomic evidence for adaptive inversion  
1219            clines in *Drosophila melanogaster*. *Mol Biol Evol*. 2016;33: 1317–1336.  
1220            doi:10.1093/molbev/msw016
- 1221    56.    Mackay TFC, Richards S, Stone EA, Barbadilla A, Ayroles JF, Zhu D, et al. The  
1222            *Drosophila melanogaster* Genetic Reference Panel. *Nature*. 2012;482: 173–178.  
1223            doi:10.1038/nature10811

- 1224 57. Huang W, Massouras A, Inoue Y, Peiffer J, Ramia M, Tarone AM, et al. Natural  
1225 variation in genome architecture among 205 *Drosophila melanogaster* Genetic  
1226 Reference Panel lines. *Genome Res.* 2014;24: 1193–1208.  
1227 doi:10.1101/gr.171546.113
- 1228 58. Corbett-Detig RB, Cardeno C, Langley CH. Sequence-based detection and breakpoint  
1229 assembly of polymorphic inversions. *Genetics.* 2012;192: 131–137.  
1230 doi:10.1534/genetics.112.141622
- 1231 59. Kulathinal RJ, Stevison LS, Noor MAF. The genomics of speciation in *Drosophila*:  
1232 diversity, divergence, and introgression estimated using low-coverage genome  
1233 sequencing. *PLoS Genet.* 2009;5: e1000550–7. doi:10.1371/journal.pgen.1000550
- 1234 60. Krimbas CB, Powell JR. *Drosophila* Inversion Polymorphism. CRC Press; 1992.
- 1235 61. Aulard S, David JR, Lemenieur F. Chromosomal inversion polymorphism in  
1236 Afrotropical populations of *Drosophila melanogaster*. *Genet Res.* 2002;79: 49–63.  
1237 doi:10.1017/S0016672301005407
- 1238 62. Ting CT, Takahashi A, Wu CI. Incipient speciation by sexual isolation in *Drosophila*:  
1239 concurrent evolution at multiple loci. *PNAS.* 2001;98: 6709–6713.
- 1240 63. Hollocher H, Ting CT, Wu ML, Wu CI. Incipient speciation by sexual isolation in  
1241 *Drosophila melanogaster*: extensive genetic divergence without reinforcement.  
1242 *Genetics.* 1997;147: 1191–1201.
- 1243 64. Hollocher H, Ting CT, Pollack F, Wu CI. Incipient speciation by sexual isolation in

- 1244 *Drosophila melanogaster*: variation in mating preference and correlation between  
1245 sexes. *Evolution*. 1997;51: 1175–1181.
- 1246 65. Coyne JA. Genetics and speciation. *Nature*. 1992;335: 511–515.
- 1247 66. Coyne JA, Orr HA. Patterns of speciation in *Drosophila*. *Evolution*. 1989;43: 362–381.
- 1248 67. Charlesworth B, Coyne JA, Barton NH. The relative rates of evolution of sex  
1249 chromosomes and autosomes. *American Naturalist*. 1987;130: 113–146.
- 1250 68. Ellis LL, Carney GE. Socially-Responsive Gene Expression in Male *Drosophila*  
1251 *melanogaster* Is Influenced by the Sex of the Interacting Partner. *Genetics*. 2011;187:  
1252 157–169. doi:10.1534/genetics.110.122754
- 1253 69. Edwards AC, Zwarts L, Yamamoto A, Callaerts P, Mackay TF. Mutations in many genes  
1254 affect aggressive behavior in *Drosophila melanogaster*. *BMC Biol*. 2009;7: 29–13.  
1255 doi:10.1186/1741-7007-7-29
- 1256 70. Nielsen R, Korneliussen T, Albrechtsen A, Li Y, Wang J. SNP calling, genotype calling,  
1257 and sample allele frequency estimation from new-generation sequencing data. *PLoS*  
1258 *ONE*. 2012;7: e37558–11. doi:10.1371/journal.pone.0037558
- 1259 71. Fumagalli M, Vieira FG, Linderoth T, Nielsen R. ngsTools: methods for population  
1260 genetics analyses from next-generation sequencing data. *Bioinformatics*. 2014;30:  
1261 1486–1487.
- 1262 72. DePristo MA, Banks E, Poplin R, Garimella KV, Maguire JR, Hartl C, et al. A framework  
1263 for variation discovery and genotyping using next-generation DNA sequencing data.



- 1264 Nat Genet. 2011;43: 491–498. doi:10.1038/ng.806
- 1265 73. Baird SJE, Barton NH, Etheridge AM. The distribution of surviving blocks of an  
1266 ancestral genome. *Theoretical Population Biology*. 2003;64: 451–471.  
1267 doi:10.1016/S0040-5809(03)00098-4
- 1268 74. Henn BM, Botigué LR, Gravel S, Wang W, Brisbin A, Byrnes JK, et al. Genomic ancestry  
1269 of north Africans supports back-to-Africa migrations. *PLoS Genet*. 2012;8:  
1270 e1002397–11. doi:10.1371/journal.pgen.1002397
- 1271 75. Moorjani P, Patterson N, Hirschhorn JN, Keinan A, Hao L, Atzmon G, et al. The history  
1272 of African gene flow into southern Europeans, Levantines, and Jews. *PLoS Genet*.  
1273 2011;7: e1001373–13. doi:10.1371/journal.pgen.1001373
- 1274 76. Loh PR, Lipson M, Patterson N, Moorjani P. Inferring admixture histories of human  
1275 populations using linkage disequilibrium. *Genetics*. 2013;193: 1233–1254.  
1276 doi:10.1534/genetics.112.147330/-/DC1
- 1277 77. Marjoram P, Wall JD. Fast “coalescent” simulation. *BMC Genet. BioMed Central*;  
1278 2006;7: 16–9. doi:10.1186/1471-2156-7-16
- 1279 78. Kiefer J. Sequential minimax search for a maximum. *Proceedings of the American*  
1280 *Mathematical Society*. 1953;4: 502–506.
- 1281 79. Chen GK, Marjoram P, Wall JD. Fast and flexible simulation of DNA sequence data.  
1282 *Genome Res*. 2008;19: 136–142. doi:10.1101/gr.083634.108
- 1283 80. Gutenkunst RN, Hernandez RD, Williamson SH, Bustamante CD. Inferring the joint

- 1284 demographic history of multiple populations from multidimensional SNP frequency  
1285 data. PLoS Genet. 2009;5: e1000695–11. doi:10.1371/journal.pgen.1000695
- 1286 81. Corbett-Detig R, Jones M. SELAM: Simulation of Epistasis and Local adaptation during  
1287 Admixture with Mate choice. Bioinformatics. 2016;btw365.
- 1288 82. Pool JE, Aquadro CF. History and Structure of Sub-Saharan Populations of *Drosophila*  
1289 *melanogaster*. Genetics. 2006;174: 915–929. doi:10.1534/genetics.106.058693
- 1290 83. Lack JB, Cardeno CM, Crepeau MW, Taylor W, Corbett-Detig RB, Stevens KA, et al. The  
1291 *Drosophila* Genome Nexus: a population genomic resource of 623 *Drosophila*  
1292 *melanogaster* genomes, including 197 from a single ancestral range population.  
1293 Genetics. 2015;199: 1229–1241. doi:10.1534/genetics.115.174664/-/DC1
- 1294 84. Li H. Aligning sequence reads, clone sequences and assembly contigs with BWA-  
1295 MEM. arXiv preprint arXiv:13033997. 2013.
- 1296 85. Adams MD, Celniker SE, Holt RA, Evans CA, Gocayne JD, Amanatides PG. The genome  
1297 sequence of *Drosophila melanogaster*. Genetics. 2000;287: 2185–2195.
- 1298 86. Li H, Handsaker B, Wysoker A, Fennell T, Ruan J, Homer N, et al. The Sequence  
1299 Alignment/Map format and SAMtools. Bioinformatics. 2009;25: 2078–2079.  
1300 doi:10.1093/bioinformatics/btp352
- 1301 87. Comeron JM, Ratnappan R, Bailin S. The many landscapes of recombination in  
1302 *Drosophila melanogaster*. PLoS Genet. 2012;8: e1002905.  
1303 doi:10.1371/journal.pgen.1002905

- 1304 88. Best DJ, Roberts DE. Algorithm AS 89: the upper tail probabilities of Spearman's rho.  
1305 Journal of the Royal Statistical Society Series C. 1975;24: 377–379.
- 1306 89. Kao JY, Lymer S, Hwang SH, Sung A, Nuzhdin SV. Postmating reproductive barriers  
1307 contribute to the incipient sexual isolation of the United States and Caribbean  
1308 *Drosophila melanogaster*. *Ecol Evol*. 2015;5: 3171–3182. doi:10.1002/ece3.1596
- 1309 90. Eden E, Navon R, Steinfeld I, Lipson D, Yakhini Z. GOrilla: a tool for discovery and  
1310 visualization of enriched GO terms in ranked gene lists. *BMC Bioinformatics* 2013  
1311 14:1. BioMed Central; 2009;10: 48–7. doi:10.1186/1471-2105-10-48
- 1312
- 1313

1314

1315 **Figure 1.** The effect of increasing stringency with ancestral LD pruning. From left to right,  
1316 ancestry proportions are 0.1, 0.25, 0.5, 0.75 and 0.9.  $|r|$  cutoffs are: none (red), 1.0 (orange),  
1317 0.9 (yellow), 0.8 (green), 0.7 (dark blue), 0.6 (cyan), 0.5 (indigo), and 0.4 (violet). The solid  
1318 line indicates the expectation for unbiased time estimation. All read data were simulated  
1319 with ploidy = 1. True admixture time was drawn from a uniform (0, 2000) distribution.  
1320

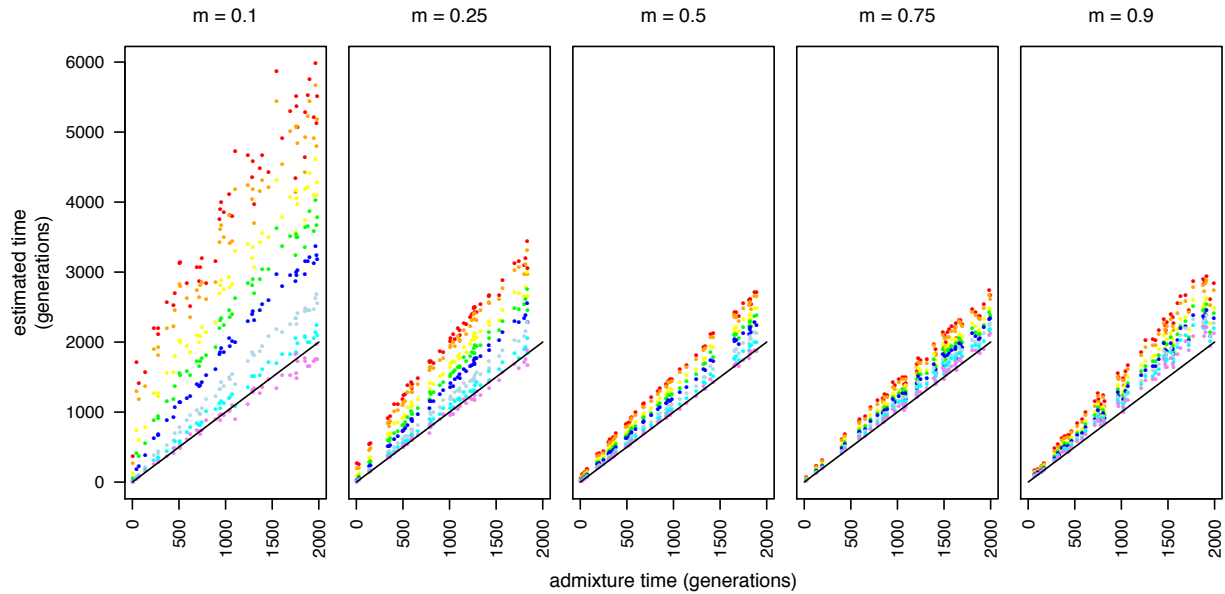

1321

1322

1323

1324

1325 **Figure 2.** Time estimates and accuracy statistics for samples of varying ploidy. From left  
1326 to right, ancestry proportions are 0.1, 0.25, 0.5, 0.75 and 0.9. Each sample ploidy is  
1327 represented by one point color with ploidy one (black), two (red), ten (blue) and twenty  
1328 (green). From top to bottom, each row is the estimated time in generations, the proportion  
1329 of sites where the true state is within the 95% credible interval, the width of the 95%  
1330 credible interval, the mean posterior error, and the proportion of sites where the maximum  
1331 likelihood estimate is equal to the true state.  
1332

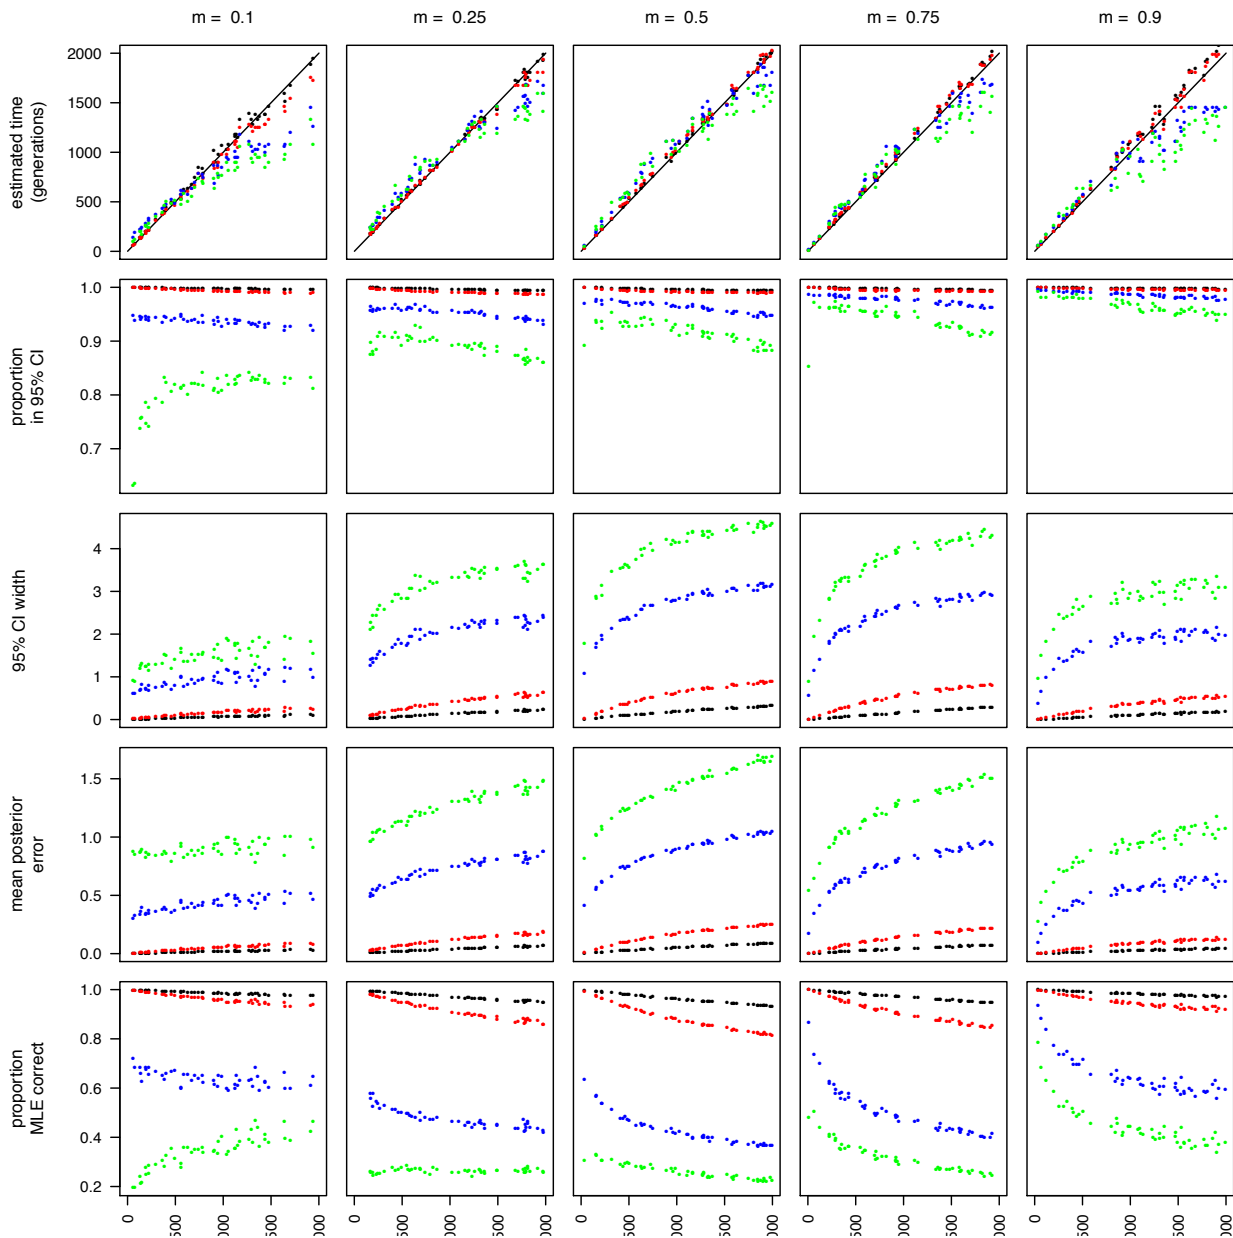

1333  
1334

1335 **Figure 3.** Comparison between LAI using the full ancestral recombination graph via  
1336 forward-time simulations (red) with those from independent and identically distributed  
1337 draws from the SMC' distribution (black). Simulations were conducted using an ancestry  
1338 proportion of 0.25 and population size of 10,000 hermaphroditic individuals.

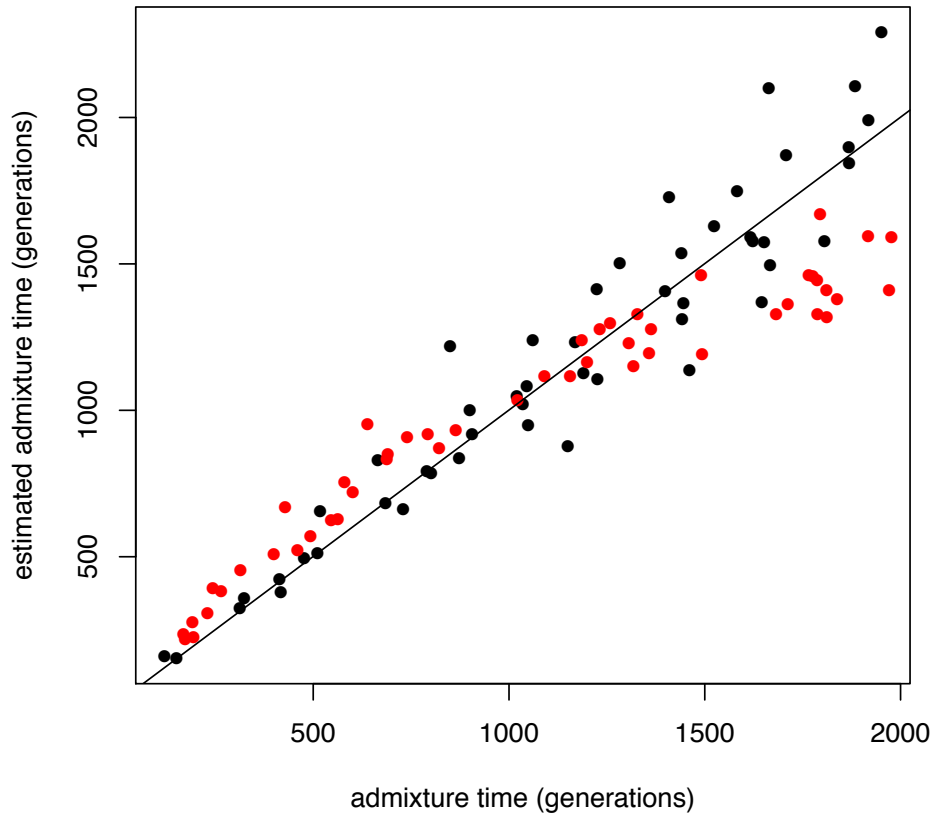

1339  
1340

1341 **Figure 4.** Effects of unknown admixed population sizes on LAI. All LAI was conducted  
1342 assuming the true population size was 10,000. Simulated population sizes were 100  
1343 (black), 1,000 (red), 10,000 (blue) and 100,000 (green). Ploidy 1 on the right, ploidy 2 on  
1344 the left. From top to bottom, rows are the estimated time of admixture, the proportion of  
1345 sites where the true state is within the 95% credible interval, the width of the 95% credible  
1346 interval, the mean posterior error, and the proportion of times that the maximum  
1347 likelihood estimate is equal to the true state. For all simulations, the ancestry proportion  
1348 was equal to 0.5.

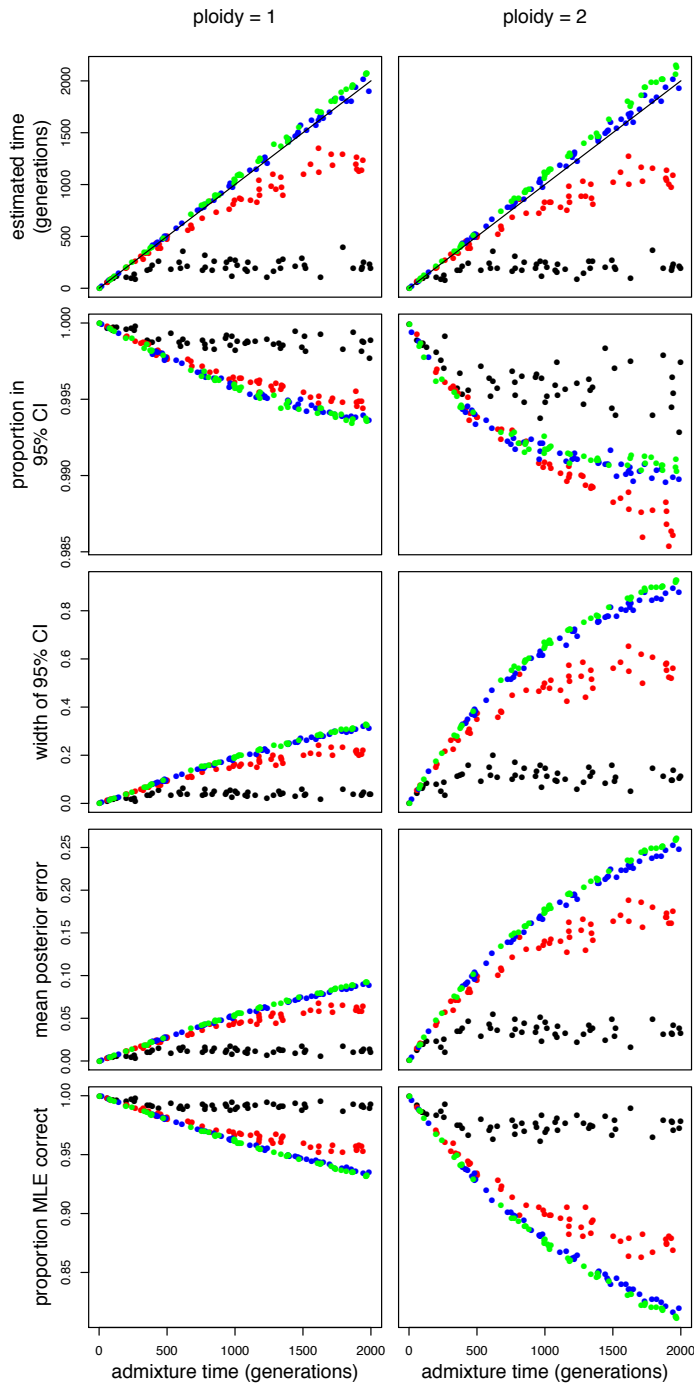

1350 **Figure 5.** LAI accuracy when admixture times are increasingly ancient. Here, ancestry  
1351 proportions are 0.5 (black), 0.25 (blue), 0.1 (violet), 0.75 (orange) and 0.9 (red). From top  
1352 to bottom, statistics plotted are estimated time, the proportion of sites where the true  
1353 ancestry frequency is within the 95% credible interval, the mean 95% credible interval  
1354 width, mean posterior error, and the proportion of times that the maximum likelihood  
1355 estimate is correct.

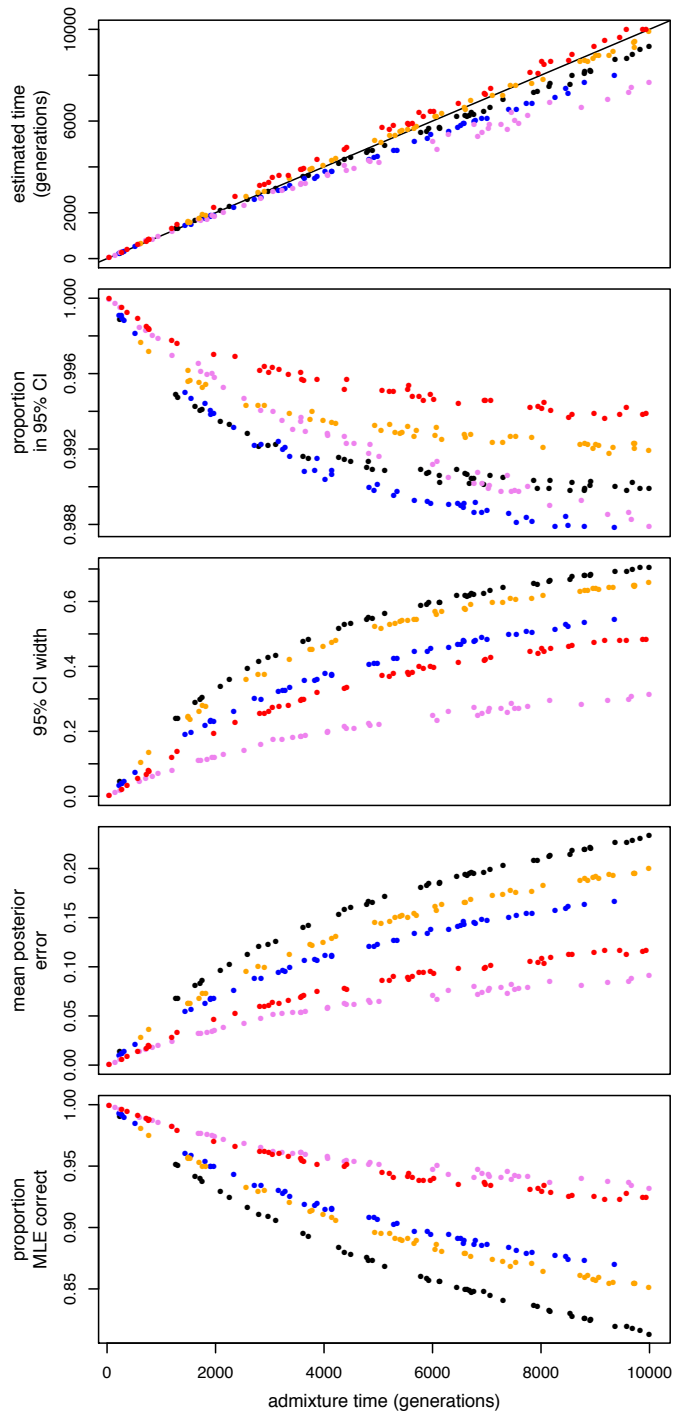

1356



1357 **Figure 6.** The effects of reference panel size on LAI and time estimation using the HMM.  
1358 Here, we compare reference panels of size 100 (blue) with reference panels of size 10  
1359 (black). From left to right, ancestry proportions are 0.1, 0.25, 0.5, 0.75 and 0.9. From top to  
1360 bottom the plotted statistics are estimated time, proportion in the 95% credible interval,  
1361 the average width of the 95% credible interval, the mean posterior error, and the  
1362 proportion of sites where the maximum likelihood ancestry estimate is correct.

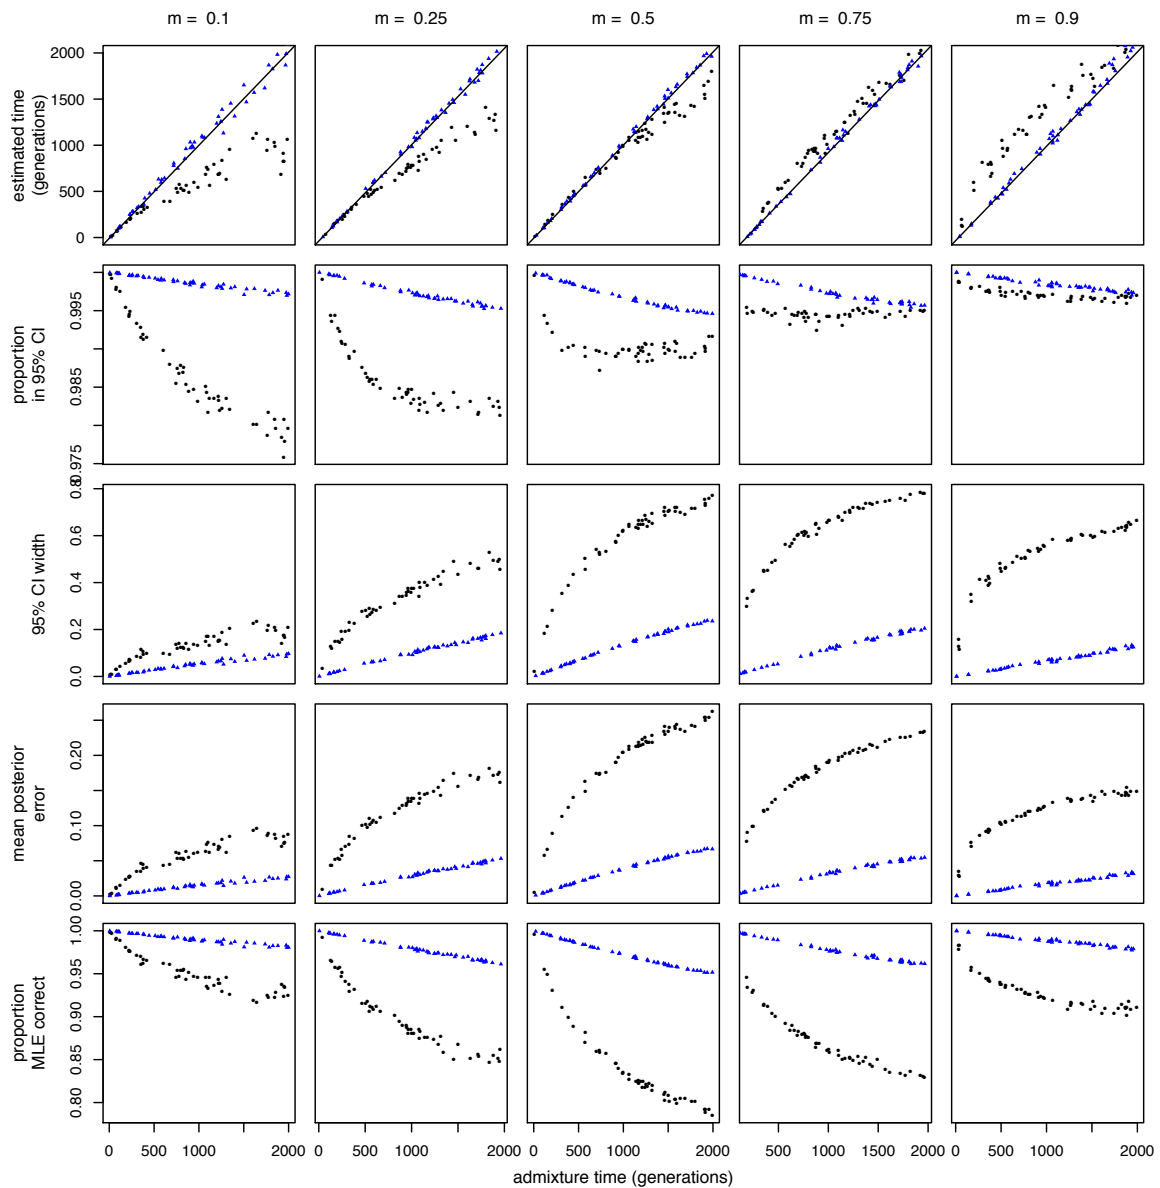

1363

1364 **Figure 7.** Accuracy of the HMM for samples of high ploidy. The 95% credible interval  
1365 (shaded blue region), and the posterior mean (red) contrasted with the true ancestry  
1366 frequencies (black). Simulated data were generated with an admixture time of 1500  
1367 generations, an ancestry proportion of 0.2, a sample ploidy of 100, and a mean sequencing  
1368 depth of 25.  
1369

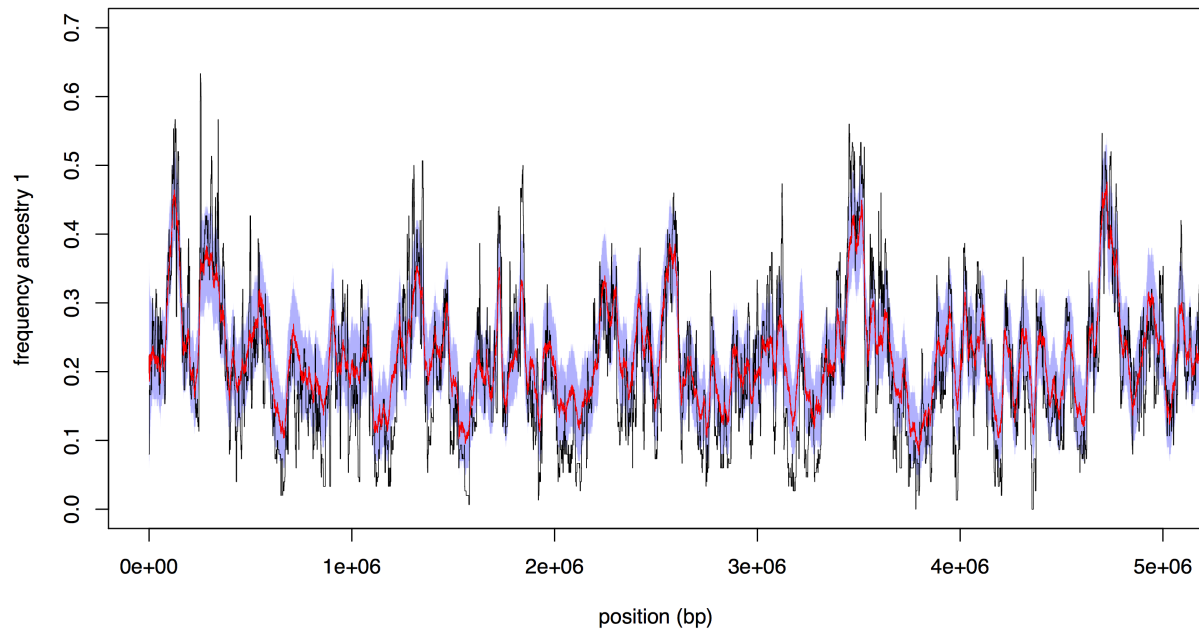

1370  
1371  
1372

1373 **Figure 8.** Comparison of the proportion of sites where the maximum likelihood ancestry  
1374 estimate of local ancestry is correct between LAMPanc and our method. LAMPanc was run  
1375 with default parameters (black), and with LD pruned in the ancestral populations, but not  
1376 in the admixed population (red). Our method was run with default parameters (blue), but  
1377 with the time since admixture and correct ancestry proportion supplied to our program as  
1378 these parameters are required by LAMPanc.  
1379

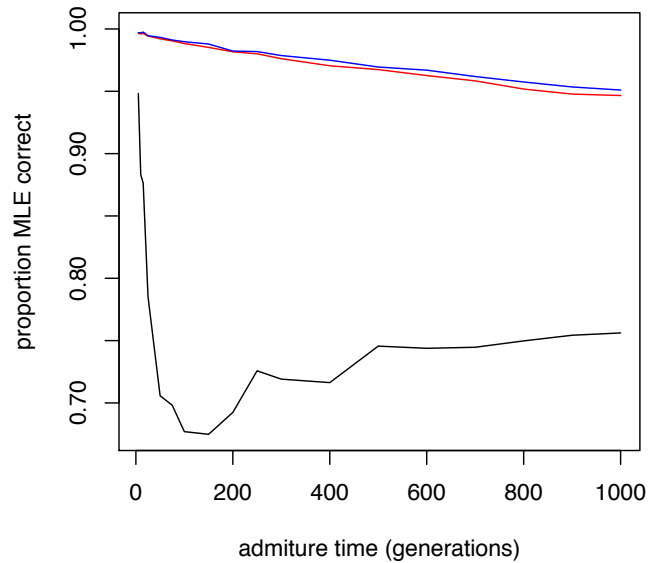

1380  
1381  
1382

1383 **Figure 9.** Admixture time estimates for simulated data consistent with variation present in  
1384 modern European and African populations. From left to right,  $m = 0.1$ ,  $m = 0.25$ ,  $m = 0.5$ ,  $m$   
1385  $= 0.75$ ,  $m = 0.9$ . Top row is completely phased chromosomes and the bottom row is for  
1386 unphased diploid data.

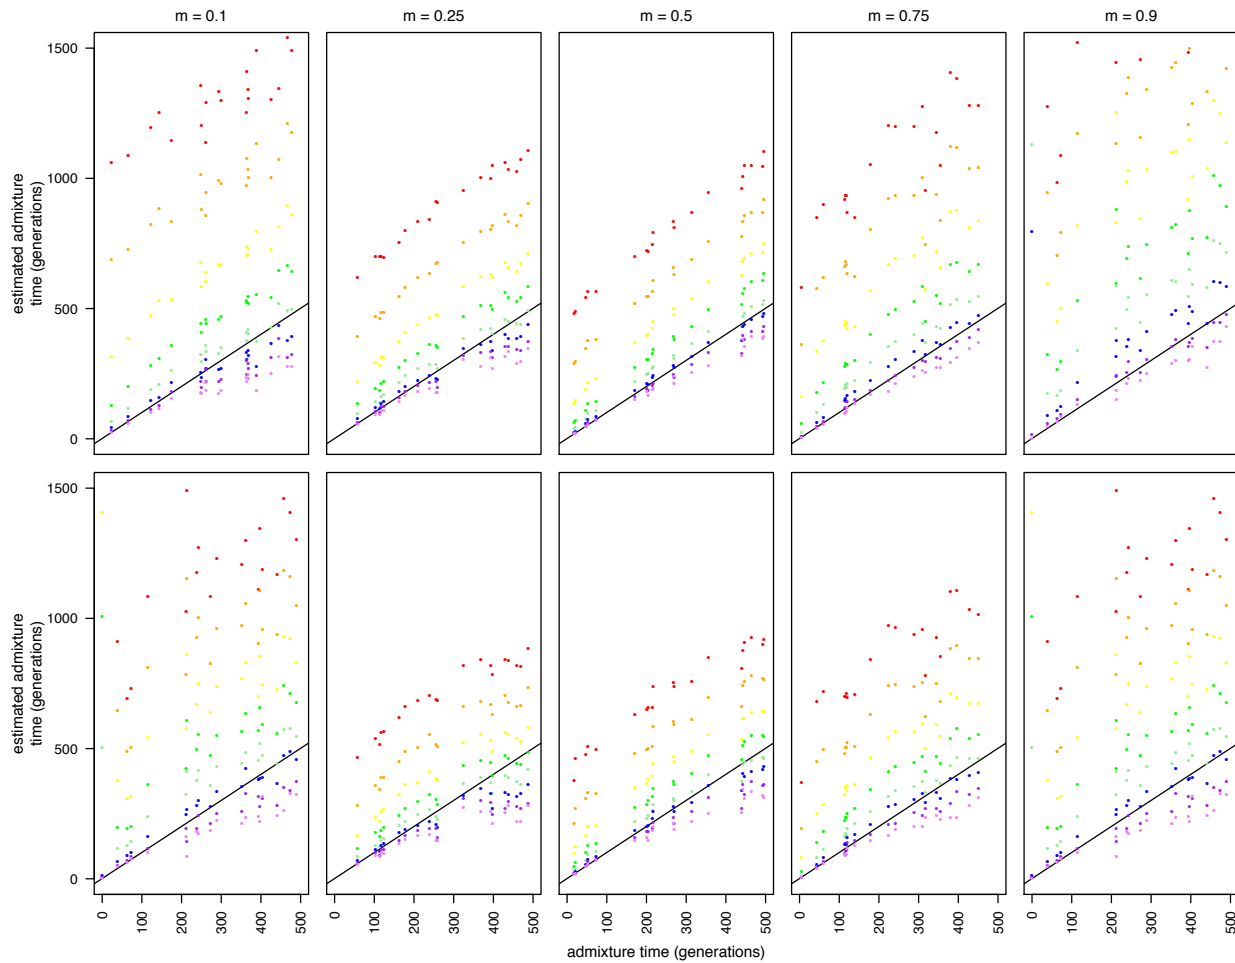

1387  
1388

1389 **Figure 10.** Bias in LAI due to uncertainty in  $t$ . The posterior probability of European  
1390 ancestry at a given site in the genome assuming  $t = 5$  (black) and assuming  $t = 20$  (red) for  
1391 a sample representative of the average difference (top left) and a more extreme example  
1392 (top right). The distribution of differences in mean Inuit ancestry for all samples (bottom  
1393 left). The log likelihood of each time since admixture as computed using our method  
1394 (bottom right), which shows a clear optimum at 6-7 generations since admixture. All  
1395 analyses were restricted to SNPs on chromosome 10.

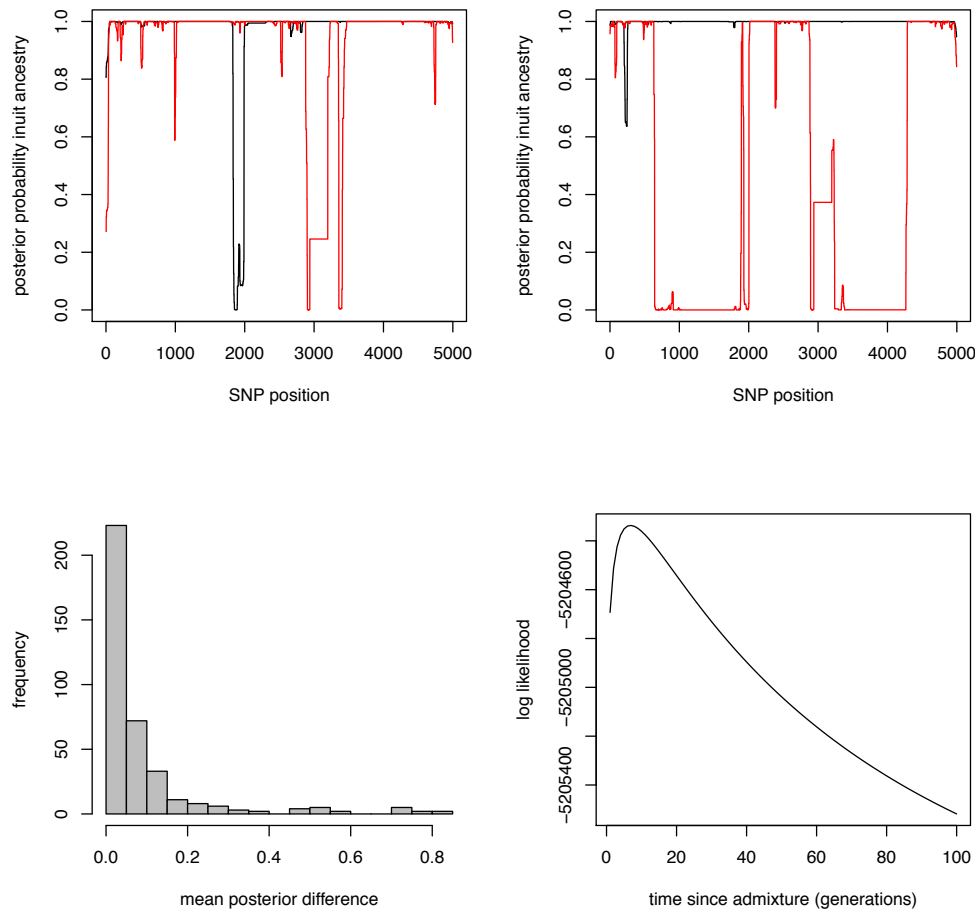

1396

1397  
1398  
1399  
1400  
1401  
1402

**Figure 11.** Local ancestry of inversion bearing chromosomes (red) compared with those of standard arrangement chromosomes (black) for the same chromosome arm. Positions of inversion breakpoints, as reported in {CorbettDetig:2012bq} are shown as vertical dashed lines.

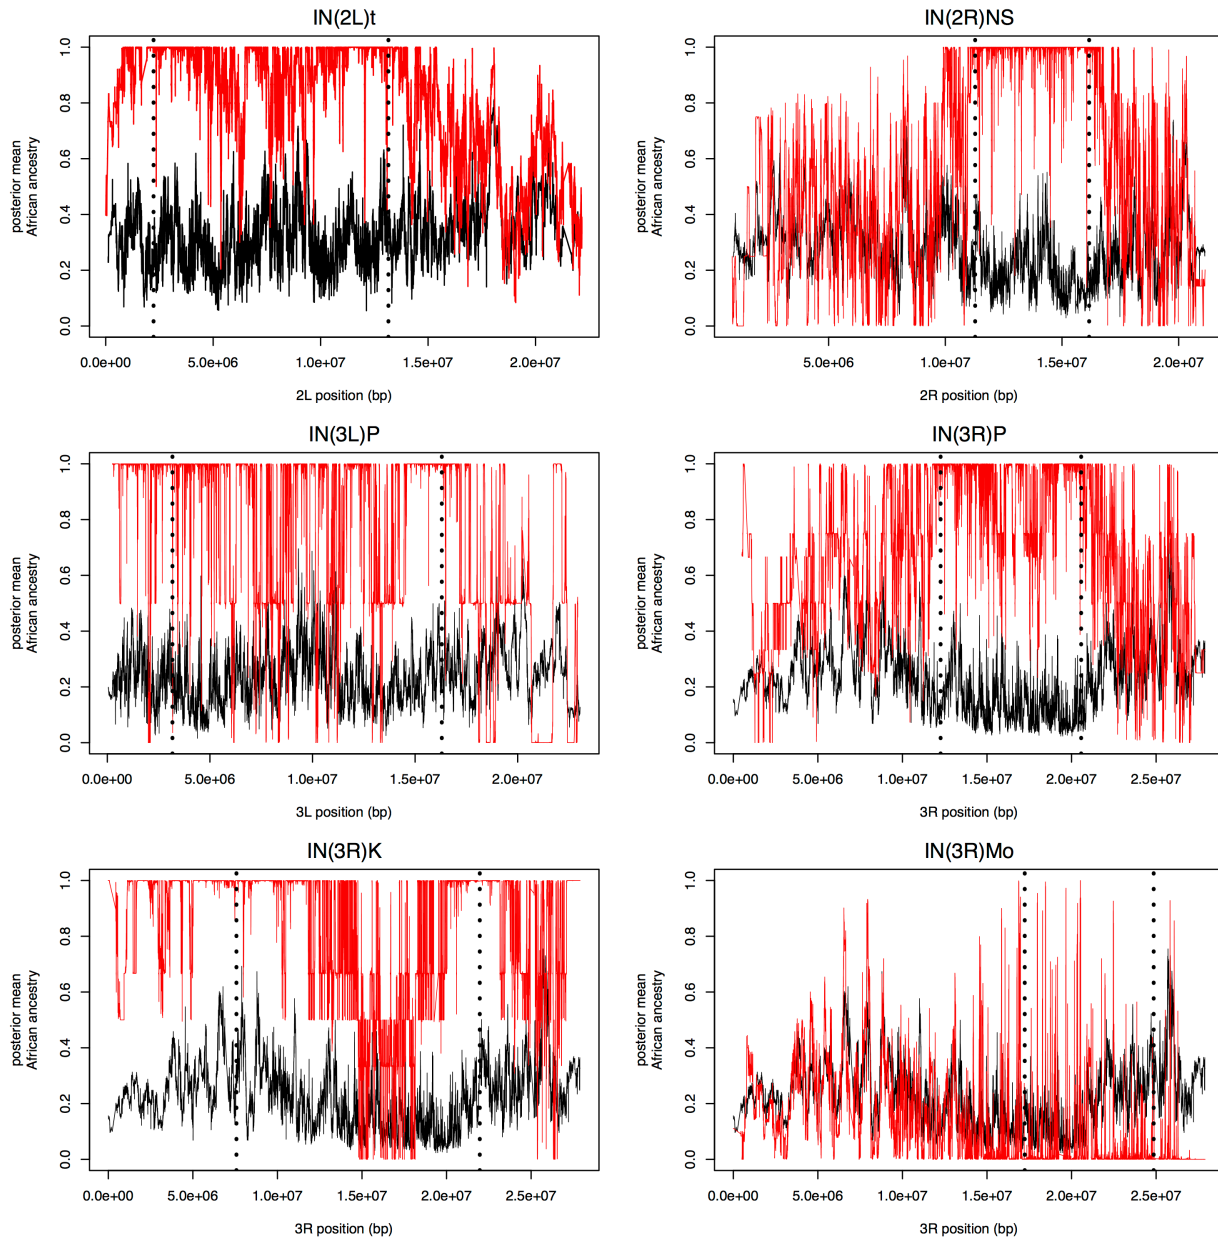

1403  
1404

1405 **Figure 12.** The partial correlation between LA and latitude with correction for  
1406 chromosome-wide ancestry proportions. Sites for which the probability of the observed  
1407 clinal relationship was less than 0.005 were retained as significant (red). Inversion  
1408 breakpoints for inversions that are at polymorphic frequencies on this ancestry cline are  
1409 shown as dotted blue lines.  
1410

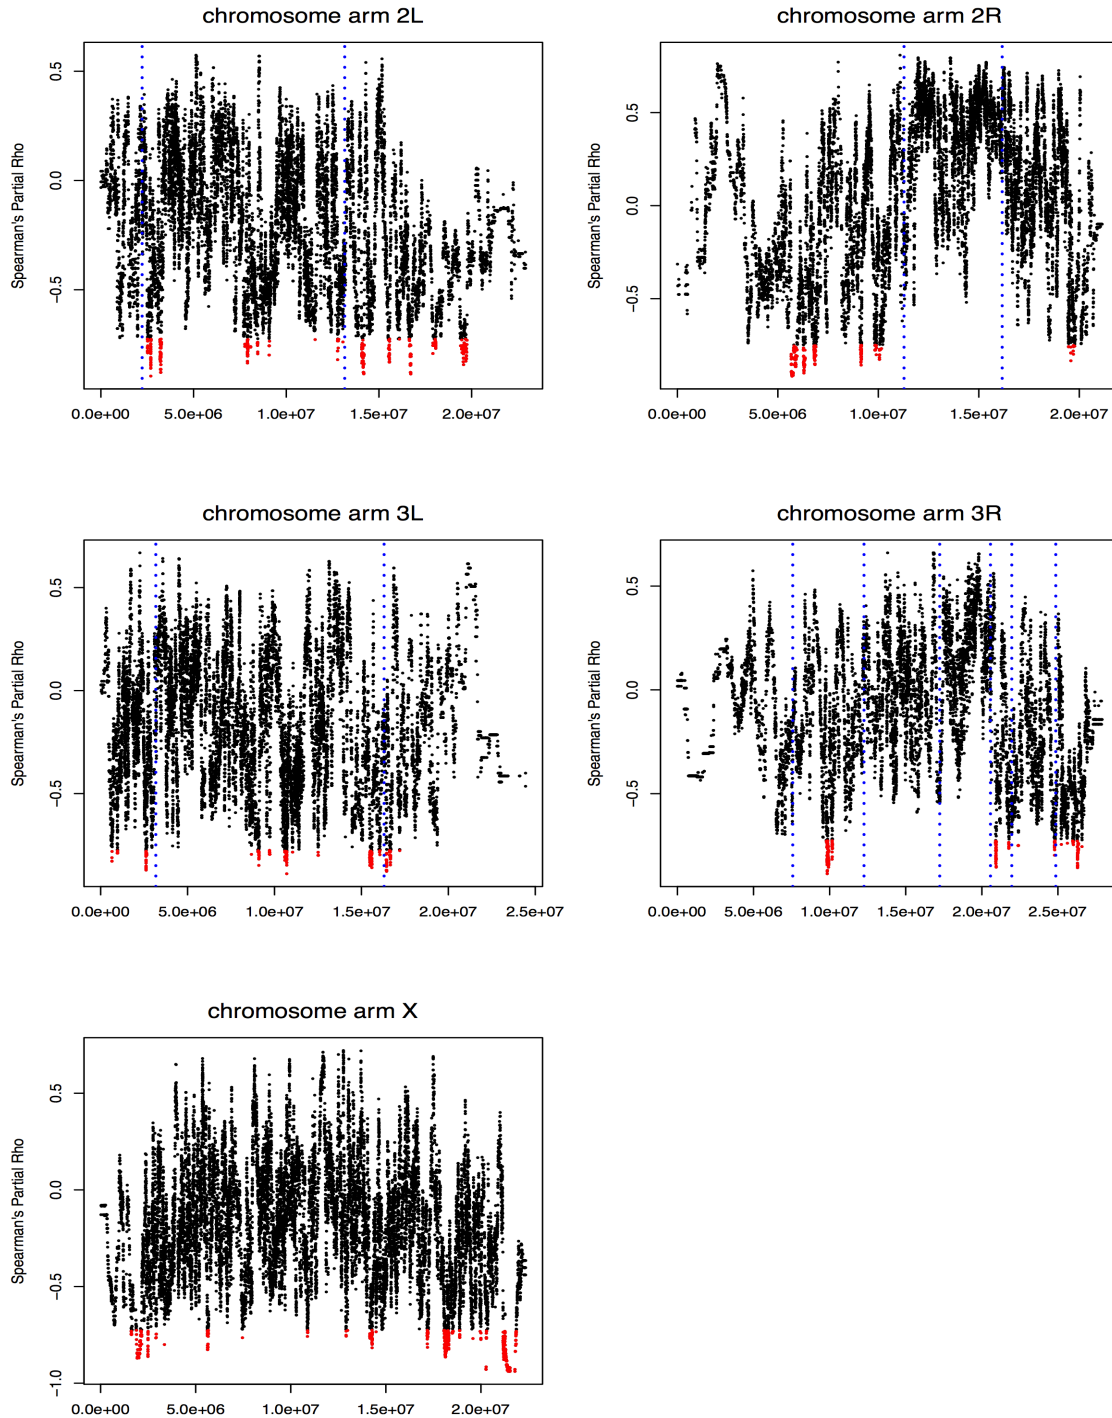

Source: http://biorxiv.org/content/10.1101/064238v1.full.pdf
